# Supplementary material for: COVID-19 and the Importance of Being Prepared: A Multidisciplinary Strategy for the Discovery of Antivirals to Combat Pandemics
Source: MDPI journal article supplement (doi:10.3390/biomedicines10061342), 2022-06-07
Supplement: s1 [file s1]

# COVID-19 and the importance of being prepared: A multidisciplinary strategy for the discovery of antivirals to combat pandemics

Maria Galvez-Llompарт, Riccardo Zanni, Jorge Galvez, Subhash C. Basak, Sagar M. Goyal

## Supplementary Material

**Table S1.** DF<sub>Class\_6LU7</sub> training set: compounds identification, 6LU7 Mpro docking score, descriptors value, classification and probability of being classified as active.

| Compound                                                                                                                                                                           | Drugbank id. | Drugbank category      | Docking score (6LU7) | MPC08 | DF <sub>Class_6LU7</sub> | Class. | P.A.  |
|------------------------------------------------------------------------------------------------------------------------------------------------------------------------------------|--------------|------------------------|----------------------|-------|--------------------------|--------|-------|
| Active group                                                                                                                                                                       |              |                        |                      |       |                          |        |       |
| Gonadorelin                                                                                                                                                                        | DB00644      | Approved; Invest.; Vet | -11.695              | 5.684 | 6.029                    | A      | 0.998 |
| Ornipressin                                                                                                                                                                        | DB13464      | Exper                  | -11.367              | 5.609 | 5.813                    | A      | 0.997 |
| Felypressin                                                                                                                                                                        | DB00093      | Exper                  | -10.940              | 4.956 | 3.906                    | A      | 0.980 |
| Carbetocin                                                                                                                                                                         | DB01282      | Approved; Invest.      | -10.381              | 5.380 | 5.143                    | A      | 0.994 |
| (E)-(4S,6S)-6-((S)-2-((S)-2-[(furan-2-carbonyl)-amino]-3-methyl-butrylamino)-3-methyl-butrylamino)-8-methyl-5-oxo-4-((r)-2-oxo-pyrrolidin-3-ylmethyl)-non-2-enoic acid ethyl ester | DB04613      | Exper                  | -10.222              | 5.897 | 6.652                    | A      | 0.999 |
| Iotrolan                                                                                                                                                                           | DB09487      | Approved               | -10.176              | 4.605 | 2.883                    | A      | 0.947 |
| Lypressin                                                                                                                                                                          | DB14642      | Approved               | -10.107              | 5.513 | 5.533                    | A      | 0.996 |
| Triptorelin                                                                                                                                                                        | DB06825      | Approved; Vet          | -10.045              | 5.945 | 6.793                    | A      | 0.999 |
| Lanreotide                                                                                                                                                                         | DB06791      | Approved               | -9.973               | 4.956 | 3.906                    | A      | 0.980 |
| Birinapant                                                                                                                                                                         | DB11782      | Invest.                | -9.893               | 6.084 | 7.198                    | A      | 0.999 |
| Indium In-111 pentetreotide                                                                                                                                                        | DB11835      | Approved; Invest.      | -9.877               | 6.116 | 7.290                    | A      | 0.999 |
| Ipamorelin                                                                                                                                                                         | DB12370      | Invest.                | -9.873               | 4.754 | 3.316                    | A      | 0.965 |
| UK-432097                                                                                                                                                                          | DB12691      | Invest.                | -9.697               | 5.756 | 6.240                    | A      | 0.998 |
| Pentagastrin                                                                                                                                                                       | DB00183      | Approved               | -9.648               | 4.984 | 3.987                    | A      | 0.982 |
| Terlipressin                                                                                                                                                                       | DB02638      | Approved; Invest.      | -9.511               | 6.192 | 7.513                    | A      | 0.999 |
| Succinamide-Coa                                                                                                                                                                    | DB03905      | Exper                  | -9.472               | 5.493 | 5.473                    | A      | 0.996 |
| Iopamidol                                                                                                                                                                          | DB08947      | Approved               | -9.397               | 5.464 | 5.388                    | A      | 0.995 |
| BV1                                                                                                                                                                                | DB04210      | Exper                  | -9.387               | 5.549 | 5.637                    | A      | 0.996 |
| Labradimil                                                                                                                                                                         | DB06549      | Invest.                | -9.377               | 5.371 | 5.116                    | A      | 0.994 |
| Etelcalcetide                                                                                                                                                                      | DB12865      | Approved; Invest.      | -9.353               | 4.942 | 3.865                    | A      | 0.979 |
| LY231514 Tetra Glu                                                                                                                                                                 | DB02223      | Exper                  | -9.318               | 4.812 | 3.487                    | A      | 0.970 |
| talactoferrin alpha                                                                                                                                                                | DB05426      | Invest.                | -9.217               | 5.333 | 5.006                    | A      | 0.993 |

|                                                                                                        |         |                        |        |       |       |   |       |
|--------------------------------------------------------------------------------------------------------|---------|------------------------|--------|-------|-------|---|-------|
| 8-Demethyl-8-Dimethylamino-Flavin-Adenine-Dinucleotide                                                 | DB03482 | Exper                  | -9.206 | 4.533 | 2.672 | A | 0.935 |
| N-(Sulfanylacetyl)Tyrosylprolylmethioninamide                                                          | DB01883 | Exper                  | -9.162 | 3.970 | 1.031 | A | 0.737 |
| Colistin                                                                                               | DB00803 | Approved               | -9.125 | 5.357 | 5.075 | A | 0.994 |
| 4'-nitrophenyl-3i-thiolaminaritrioside                                                                 | DB03990 | Exper                  | -9.014 | 5.858 | 6.538 | A | 0.999 |
| Hydroxyethyl cellulose                                                                                 | DB11602 | Approved               | -9.014 | 5.684 | 6.029 | A | 0.998 |
| S-(2-Oxo)Pentadecylcoa                                                                                 | DB02271 | Exper                  | -9.000 | 5.069 | 4.236 | A | 0.986 |
| 4-Hydroxyphenacyl Coenzyme A                                                                           | DB03613 | Exper                  | -8.999 | 5.416 | 5.249 | A | 0.995 |
| Coa-S-Acetyl Tryptamine                                                                                | DB02931 | Exper                  | -8.927 | 5.541 | 5.614 | A | 0.996 |
| Vapreotide                                                                                             | DB04894 | Exper;<br>Invest.      | -8.904 | 5.762 | 6.258 | A | 0.998 |
| Adrabetadex                                                                                            | DB15146 | Invest.                | -8.894 | 6.436 | 8.224 | A | 1.000 |
| Thymopentin                                                                                            | DB11996 | Invest.                | -8.889 | 4.554 | 2.734 | A | 0.939 |
| Saquinavir                                                                                             | DB01232 | Approved;<br>Invest.   | -8.844 | 5.403 | 5.210 | A | 0.995 |
| 3-Thiaoctanoyl-Coenzyme A                                                                              | DB03415 | Exper                  | -8.745 | 4.007 | 1.139 | A | 0.758 |
| 4-methyl-pentanoic acid {1-[4-guanidino-1-(thiazole-2-carbonyl)-butylcarbamoyl]-2-methyl-propyl}-amide | DB07299 | Exper                  | -8.745 | 5.580 | 5.726 | A | 0.997 |
| Sinapoyl Coenzyme A                                                                                    | DB03179 | Exper                  | -8.736 | 4.984 | 3.987 | A | 0.982 |
| P1-(5'-Adenosyl)P5-(5'-Thymidyl)Pentaphosphate                                                         | DB03280 | Exper                  | -8.726 | 4.500 | 2.576 | A | 0.929 |
| Dotatate                                                                                               | DB14554 | Approved;<br>Exper     | -8.708 | 5.509 | 5.521 | A | 0.996 |
| 3-[3-(2,3-Dihydroxy-Propylamino)-Phenyl]-4-(5-Fluoro-1-Methyl-1h-Indol-3-Yl)-Pyrrole-2,5-Dione         | DB01772 | Exper                  | -8.697 | 5.063 | 4.218 | A | 0.985 |
| Iobitridol                                                                                             | DB12407 | Approved;<br>Invest.   | -8.697 | 5.112 | 4.362 | A | 0.987 |
| Angiotensin II                                                                                         | DB11842 | Approved;<br>Invest.   | -8.674 | 5.485 | 5.449 | A | 0.996 |
| Flavin adenine dinucleotide                                                                            | DB03147 | Approved               | -8.539 | 5.476 | 5.425 | A | 0.996 |
| Iodixanol                                                                                              | DB01249 | Approved               | -8.538 | 5.017 | 4.085 | A | 0.983 |
| Sufugolix                                                                                              | DB06494 | Invest.                | -8.501 | 4.234 | 1.801 | A | 0.858 |
| Elamipretide                                                                                           | DB11981 | Invest.                | -8.476 | 5.768 | 6.276 | A | 0.998 |
| Flavin-N7 Protonated-Adenine Dinucleotide                                                              | DB02332 | Exper                  | -8.446 | 5.976 | 6.883 | A | 0.999 |
| Alatrofloxacin                                                                                         | DB09335 | Approved;<br>Withdrawn | -8.428 | 5.704 | 6.088 | A | 0.998 |
| Methylmalonyl-Coenzyme A                                                                               | DB04045 | Exper                  | -8.428 | 5.004 | 4.047 | A | 0.983 |
| Coa-S-Trimethylene-Acetyl-Tryptamine                                                                   | DB01777 | Exper                  | -8.422 | 5.513 | 5.533 | A | 0.996 |
| Trifluoroacetyl Coenzyme A                                                                             | DB01969 | Exper                  | -8.388 | 5.624 | 5.855 | A | 0.997 |
| Je-2147, Ag1776, Kni-764                                                                               | DB02668 | Exper                  | -8.329 | 5.198 | 4.614 | A | 0.990 |
| Giripladib                                                                                             | DB15426 | Invest.                | -8.314 | 4.779 | 3.391 | A | 0.967 |

|                                                                              |         |                      |        |       |         |   |       |
|------------------------------------------------------------------------------|---------|----------------------|--------|-------|---------|---|-------|
| Efrotomycin                                                                  | DB11401 | Vet                  | -8.288 | 4.615 | 2.912   | A | 0.948 |
| 3-[1-(3-aminopropyl)-1h-indol-3-yl]-4-(1h-indol-3-yl)-1h-pyrrole-2,5-dione   | DB07457 | Exper                | -8.259 | 5.347 | 5.048   | A | 0.994 |
| Fosifloxuridine nafalbenamide                                                | DB14859 | Invest.              | -8.250 | 5.268 | 4.816   | A | 0.992 |
| HM-30181                                                                     | DB14070 | Exper                | -8.238 | 4.466 | 2.477   | A | 0.923 |
| 2-Hydroxy-5-((1-[(4-Methylphenoxy)Methyl]-3-Oxoprop-1-Enyl)Amino)-L-Tyrosine | DB02537 | Exper                | -8.232 | 4.277 | 1.925   | A | 0.873 |
| Caspofungin                                                                  | DB00520 | Approved             | -8.208 | 4.927 | 3.823   | A | 0.979 |
| Benzoyl-Arginine-Alanine-Methyl Ketone                                       | DB03536 | Exper                | -8.200 | 3.761 | 0.421   | A | 0.604 |
| Inhibitor Bea388                                                             | DB04255 | Exper                | -8.191 | 5.493 | 5.473   | A | 0.996 |
| 3-[(5s)-1-Acetyl-3-(2-Chlorophenyl)-4,5-Dihydro-1h-Pyrazol-5-Yl]Phenol       | DB03996 | Exper                | -8.186 | 5.380 | 5.143   | A | 0.994 |
| Cefbuperazone                                                                | DB13638 | Exper                | -8.171 | 4.500 | 2.576   | A | 0.929 |
| Telnavir                                                                     | DB12178 | Invest.              | -8.164 | 5.961 | 6.838   | A | 0.999 |
| Nicotinamide-Adenine-Dinucleotide-5-Hydroxy-4-Oxonorvaline                   | DB02349 | Exper                | -8.154 | 5.609 | 5.813   | A | 0.997 |
| Cangrelor                                                                    | DB06441 | Approved             | -8.151 | 5.557 | 5.659   | A | 0.997 |
| Polymyxin B                                                                  | DB00781 | Approved;<br>Vet     | -8.149 | 5.489 | 5.461   | A | 0.996 |
| N-(4-carbamimidoylbenzyl)-1-(4-methylpentanoyl)-L-prolinamide                | DB06936 | Exper                | -8.129 | 5.338 | 5.020   | A | 0.993 |
| NUC-1031                                                                     | DB15057 | Invest.              | -8.118 | 4.949 | 3.886   | A | 0.980 |
| Larazotide                                                                   | DB05645 | Invest.              | -8.117 | 5.533 | 5.591   | A | 0.996 |
| Inarigivir soproxil                                                          | DB15063 | Invest.              | -8.105 | 5.677 | 6.009   | A | 0.998 |
| Cephalosporin Analog                                                         | DB02136 | Exper                | -8.077 | 5.308 | 4.934   | A | 0.993 |
| FR236913                                                                     | DB02830 | Exper                | -8.056 | 5.176 | 4.549   | A | 0.990 |
| TOP-1288                                                                     | DB14839 | Invest.              | -8.054 | 4.883 | 3.693   | A | 0.976 |
| Ioforminol                                                                   | DB12439 | Invest.              | -8.050 | 4.762 | 3.341   | A | 0.966 |
| Dirlotapide                                                                  | DB11399 | Invest.;<br>Vet      | -8.034 | 4.898 | 3.737   | A | 0.977 |
| BMS-986094                                                                   | DB11966 | Invest.              | -8.021 | 6.033 | 7.049   | A | 0.999 |
| Iopentol                                                                     | DB13861 | Exper                | -8.016 | 4.543 | 2.703   | A | 0.937 |
| Carfilzomib                                                                  | DB08889 | Approved;<br>Invest. | -8.009 | 5.056 | 4.199   | A | 0.985 |
| 4-Oxo-Nicotinamide-Adenine Dinucleotide Phosphate                            | DB01753 | Exper                | -8.002 | 5.919 | 6.715   | A | 0.999 |
| Inactive Group                                                               |         |                      |        |       |         |   |       |
| Agmatine                                                                     | DB08838 | Exper;<br>Invest.    | -2.000 | 0.000 | -10.550 | I | 0.000 |
| 1-acetyl-2-lyso-sn-glycero-3-phosphoethanolamine                             | DB04731 | Exper                | -1.961 | 2.398 | -3.555  | I | 0.028 |
| Glycerin                                                                     | DB09462 | Approved;<br>Invest. | -1.961 | 0.000 | -10.550 | I | 0.000 |

|                                                                            |         |                   |        |       |         |   |       |
|----------------------------------------------------------------------------|---------|-------------------|--------|-------|---------|---|-------|
| Magnesium glycinate                                                        | DB11189 | Approved          | -1.960 | 0.000 | -10.550 | I | 0.000 |
| Zinc glycinate                                                             | DB14493 | Exper             | -1.960 | 0.000 | -10.550 | I | 0.000 |
| Aluminum zirconium octachlorohydrate gly                                   | DB11200 | Approved          | -1.956 | 0.000 | -10.550 | I | 0.000 |
| Dihydroxyacetone                                                           | DB01775 | Exper             | -1.956 | 0.000 | -10.550 | I | 0.000 |
| Ferrous glycine sulfate                                                    | DB14501 | Approved          | -1.956 | 0.000 | -10.550 | I | 0.000 |
| (S)-2-Amino-4-[(2S,3R)-2,3,5-Trihydroxy-4-Oxo-Pentyl]Mercapto-Butyric Acid | DB04182 | Exper             | -1.908 | 2.485 | -3.302  | I | 0.036 |
| 1,4-Butanediol                                                             | DB01955 | Exper             | -1.859 | 0.000 | -10.550 | I | 0.000 |
| Amyl Nitrite                                                               | DB01612 | Approved          | -1.822 | 0.000 | -10.550 | I | 0.000 |
| 3-Oxo-Pentadecanoic Acid                                                   | DB04039 | Exper             | -1.815 | 2.398 | -3.555  | I | 0.028 |
| 4-Hydroxybutan-1-Aminium                                                   | DB02541 | Exper             | -1.809 | 0.000 | -10.550 | I | 0.000 |
| NB-001                                                                     | DB12716 | Invest.           | -1.783 | 3.807 | 0.554   | A | 0.635 |
| L-cystein-s-1-(iminomethyl)-l-ornithine                                    | DB04671 | Exper             | -1.733 | 2.485 | -3.302  | I | 0.036 |
| L-Alpha-Glycerophosphorylserine                                            | DB02497 | Exper             | -1.729 | 2.079 | -4.484  | I | 0.011 |
| 2-Hydroxyethyl Disulfide                                                   | DB02486 | Exper             | -1.698 | 0.000 | -10.550 | I | 0.000 |
| Ricinoleic Acid                                                            | DB02955 | Exper             | -1.612 | 2.639 | -2.852  | I | 0.055 |
| cis-Vaccenic acid                                                          | DB04801 | Exper             | -1.610 | 2.565 | -3.068  | I | 0.044 |
| Tylosin                                                                    | DB11475 | Vet               | -1.587 | 5.568 | 5.693   | A | 0.997 |
| Dexpanthenol                                                               | DB09357 | Approved          | -1.578 | 1.609 | -5.855  | I | 0.003 |
| Nz-(1-Carboxyethyl)-Lysine                                                 | DB02370 | Exper             | -1.566 | 2.197 | -4.141  | I | 0.016 |
| Troleandomycin                                                             | DB13179 | Approved          | -1.566 | 5.513 | 5.533   | A | 0.996 |
| N-(Phosphonoacetyl)-L-Ornithine                                            | DB02011 | Exper             | -1.542 | 2.303 | -3.833  | I | 0.021 |
| Sevelamer                                                                  | DB00658 | Approved          | -1.522 | 0.000 | -10.550 | I | 0.000 |
| 3,7,11,15-tetramethyl-hexadecan-1-ol                                       | DB01637 | Exper;<br>Invest. | -1.515 | 2.708 | -2.651  | I | 0.066 |
| Nz-(Dicarboxymethyl)Lysine                                                 | DB01815 | Exper             | -1.508 | 2.398 | -3.555  | I | 0.028 |
| L-Alpha-Glycerophosphorylethanol amine                                     | DB03484 | Exper             | -1.502 | 1.386 | -6.506  | I | 0.001 |
| 1,3-Propandiol                                                             | DB02774 | Exper             | -1.482 | 0.000 | -10.550 | I | 0.000 |
| N-Alpha-L-Acetyl-Arginine                                                  | DB01985 | Exper             | -1.475 | 2.197 | -4.141  | I | 0.016 |
| Methylethylamine                                                           | DB02396 | Exper             | -1.437 | 0.000 | -10.550 | I | 0.000 |
| (9Z,11E,13S)-13-hydroxyoctadeca-9,11-dienoic acid                          | DB06926 | Exper             | -1.410 | 2.639 | -2.852  | I | 0.055 |
| (3R)-3-hydroxydodecanoic acid                                              | DB07930 | Exper             | -1.409 | 2.944 | -1.961  | I | 0.123 |
| N-Butyl-N'-Hydroxyguanidine                                                | DB02727 | Exper             | -1.371 | 0.000 | -10.550 | I | 0.000 |
| 2-Decenoyl N-Acetyl Cysteamine                                             | DB03813 | Exper             | -1.357 | 2.398 | -3.555  | I | 0.028 |
| 4-amino-n-[(2-sulfanylethyl)carbamoyl]benzenesulfonamide                   | DB08484 | Exper             | -1.335 | 2.833 | -2.286  | I | 0.092 |

|                                                                                               |         |                                        |        |       |         |   |       |
|-----------------------------------------------------------------------------------------------|---------|----------------------------------------|--------|-------|---------|---|-------|
| Cimetidine                                                                                    | DB00501 | Approved;<br>Invest.                   | -1.306 | 2.773 | -2.462  | I | 0.079 |
| undecylamine-n,n-dimethyl-n-oxide                                                             | DB07646 | Exper                                  | -1.302 | 2.079 | -4.484  | I | 0.011 |
| MF268                                                                                         | DB04021 | Exper                                  | -1.288 | 2.944 | -1.961  | I | 0.123 |
| Triethoxycaprylylsilane                                                                       | DB11267 | Exper                                  | -1.283 | 2.398 | -3.555  | I | 0.028 |
| Ethyl Isocyanide                                                                              | DB03399 | Exper                                  | -1.203 | 0.000 | -10.550 | I | 0.000 |
| Alpha-linolenic acid                                                                          | DB00132 | Approved;<br>Invest.;<br>Nutraceutical | -1.198 | 2.565 | -3.068  | I | 0.044 |
| Sodium lauryl sulfate                                                                         | DB00815 | Approved                               | -1.178 | 2.303 | -3.833  | I | 0.021 |
| Dodecyl sulfate                                                                               | DB03967 | Exper                                  | -1.174 | 2.303 | -3.833  | I | 0.021 |
| Magnesium stearate                                                                            | DB14077 | Invest.                                | -1.174 | 3.219 | -1.161  | I | 0.239 |
| Guanidine-3-Propanol                                                                          | DB03637 | Exper                                  | -1.153 | 0.000 | -10.550 | I | 0.000 |
| Dolastatin 10                                                                                 | DB12730 | Invest.                                | -1.137 | 5.030 | 4.124   | A | 0.984 |
| (10E,12Z)-octadecadienoic acid                                                                | DB04746 | Exper                                  | -1.114 | 2.565 | -3.068  | I | 0.044 |
| S-(D-Carboxybutyl)-L-Homocysteine                                                             | DB02337 | Exper                                  | -1.108 | 2.079 | -4.484  | I | 0.011 |
| N2-(Carboxyethyl)-L-Arginine                                                                  | DB04189 | Exper                                  | -1.104 | 2.398 | -3.555  | I | 0.028 |
| diethyl propane-1,3-diylbiscarbamate                                                          | DB08501 | Exper                                  | -1.072 | 2.197 | -4.141  | I | 0.016 |
| GW-274150                                                                                     | DB12237 | Invest.                                | -1.060 | 1.946 | -4.874  | I | 0.008 |
| Etoglucid                                                                                     | DB13339 | Exper                                  | -1.057 | 2.708 | -2.651  | I | 0.066 |
| Palmitoleic Acid                                                                              | DB04257 | Exper                                  | -1.019 | 2.398 | -3.555  | I | 0.028 |
| Odalasvir                                                                                     | DB13041 | Invest.                                | -1.013 | 6.526 | 8.488   | A | 1.000 |
| 3-Hydroxy-Myristic Acid                                                                       | DB02767 | Exper                                  | -1.002 | 2.303 | -3.833  | I | 0.021 |
| Nitrosoethane                                                                                 | DB02646 | Exper                                  | -0.974 | 0.000 | -10.550 | I | 0.000 |
| Elaidoylamide                                                                                 | DB03784 | Exper                                  | -0.953 | 2.565 | -3.068  | I | 0.044 |
| Bromo-Dodecanol                                                                               | DB02619 | Exper                                  | -0.947 | 1.946 | -4.874  | I | 0.008 |
| Ethylhexylglycerin                                                                            | DB14557 | Exper                                  | -0.914 | 1.792 | -5.323  | I | 0.005 |
| Rifampicin                                                                                    | DB01045 | Approved                               | -0.888 | 5.958 | 6.831   | A | 0.999 |
| 1-Guanidinium-7-Aminoheptane                                                                  | DB03639 | Exper                                  | -0.881 | 1.609 | -5.855  | I | 0.003 |
| Ethanolamine oleate                                                                           | DB06689 | Approved                               | -0.866 | 2.565 | -3.068  | I | 0.044 |
| Ethanol                                                                                       | DB00898 | Approved                               | -0.776 | 0.000 | -10.550 | I | 0.000 |
| C31G                                                                                          | DB05398 | Invest.                                | -0.753 | 2.996 | -1.811  | I | 0.140 |
| n-dodecyl-n,n-dimethylglycinate                                                               | DB07631 | Exper                                  | -0.753 | 2.485 | -3.302  | I | 0.036 |
| 5-N-Allyl-Arginine                                                                            | DB03892 | Exper                                  | -0.752 | 2.197 | -4.141  | I | 0.016 |
| Hexaminolevulinate                                                                            | DB06261 | Approved                               | -0.718 | 2.079 | -4.484  | I | 0.011 |
| Cetrimonium                                                                                   | DB01718 | Approved                               | -0.607 | 2.565 | -3.068  | I | 0.044 |
| Dibutylsuccinate                                                                              | DB13332 | Exper                                  | -0.599 | 2.197 | -4.141  | I | 0.016 |
| 2-[3-(2-Hydroxy-1,1-Dihydroxymethyl-Ethylamino)-Propylamino]-2-Hydroxymethyl-Propane-1,3-Diol | DB02676 | Exper                                  | -0.567 | 2.773 | -2.462  | I | 0.079 |

|                                           |         |                           |        |       |         |   |       |
|-------------------------------------------|---------|---------------------------|--------|-------|---------|---|-------|
| Tiadenol                                  | DB13348 | Exper                     | -0.524 | 2.398 | -3.555  | I | 0.028 |
| N5-(1-Imino-3-Butenyl)-L-Ornithine        | DB03710 | Exper                     | -0.514 | 2.079 | -4.484  | I | 0.011 |
| 3,6,9,12,15-Pentaoxaheptadecane           | DB02343 | Exper                     | -0.513 | 2.303 | -3.833  | I | 0.021 |
| N-Omega-Propyl-L-Arginine                 | DB02644 | Exper                     | -0.511 | 2.197 | -4.141  | I | 0.016 |
| Diocetylmonium                            | DB13970 | Approved;<br>Exper        | -0.501 | 2.639 | -2.852  | I | 0.055 |
| Decamethonium                             | DB01245 | Approved                  | -0.459 | 2.398 | -3.555  | I | 0.028 |
| 11-[(mercaptocarbonyl)oxy]undecanoic acid | DB08712 | Exper                     | -0.453 | 2.303 | -3.833  | I | 0.021 |
| N-Omega-Hydroxy-L-Arginine                | DB03144 | Exper                     | -0.414 | 1.946 | -4.874  | I | 0.008 |
| Dodecane-Trimethylamine                   | DB02779 | Exper                     | -0.410 | 2.197 | -4.141  | I | 0.016 |
| Hydroxybutyloxide                         | DB14079 | Exper                     | -0.395 | 1.609 | -5.855  | I | 0.003 |
| Tris(Hydroxyethyl)Amino methane           | DB04237 | Exper                     | -0.364 | 0.000 | -10.550 | I | 0.000 |
| Lauroyl chloride                          | DB14670 | Exper                     | -0.358 | 1.946 | -4.874  | I | 0.008 |
| 12-Hydroxydodecanoic Acid                 | DB03704 | Exper                     | -0.348 | 2.079 | -4.484  | I | 0.011 |
| Diethylhomospermine                       | DB13011 | Invest.                   | -0.337 | 1.609 | -5.855  | I | 0.003 |
| Oleic Acid                                | DB04224 | Approved;<br>Invest.; Vet | -0.319 | 2.565 | -3.068  | I | 0.044 |
| Silanol                                   | DB11343 | Approved                  | -0.311 | 0.000 | -10.550 | I | 0.000 |
| N3, N4-Dimethylarginine                   | DB02302 | Exper                     | -0.295 | 2.197 | -4.141  | I | 0.016 |
| Pentaglyme                                | DB02580 | Exper                     | -0.221 | 2.398 | -3.555  | I | 0.028 |
| Ocrylate                                  | DB15086 | Invest.                   | -0.198 | 2.079 | -4.484  | I | 0.011 |
| Isopropyl myristate                       | DB13966 | Approved;<br>Exper        | -0.188 | 2.485 | -3.302  | I | 0.036 |
| Monoctanoin                               | DB06801 | Exper                     | -0.151 | 2.079 | -4.484  | I | 0.011 |
| 3,6,9,12,15,18-hexaoxaicosane             | DB06867 | Exper                     | -0.112 | 2.565 | -3.068  | I | 0.044 |
| Vinyl ether                               | DB13690 | Exper                     | -0.108 | 0.000 | -10.550 | I | 0.000 |
| NCX 701                                   | DB05409 | Invest.                   | -0.094 | 3.367 | -0.728  | I | 0.326 |
| Trolnitrate                               | DB13719 | Exper                     | -0.094 | 2.773 | -2.462  | I | 0.079 |
| Methyl Nonanoate (Ester)                  | DB01631 | Exper                     | -0.084 | 1.609 | -5.855  | I | 0.003 |
| Palmitic Acid                             | DB03796 | Approved                  | -0.081 | 2.398 | -3.555  | I | 0.028 |
| sebacic acid                              | DB07645 | Exper                     | -0.070 | 1.946 | -4.874  | I | 0.008 |
| Azelaic acid                              | DB00548 | Approved                  | -0.064 | 1.792 | -5.323  | I | 0.005 |
| Bombykol                                  | DB02982 | Exper                     | -0.004 | 2.303 | -3.833  | I | 0.021 |
| Nitrous acid                              | DB09112 | Approved;<br>Invest.      | 0.022  | 0.000 | -10.550 | I | 0.000 |
| L-Homoarginine                            | DB03974 | Exper                     | 0.040  | 1.946 | -4.874  | I | 0.008 |
| O-Decyl Hydrogen Thiocarbonate            | DB08684 | Exper                     | 0.106  | 1.946 | -4.874  | I | 0.008 |
| Lauric acid                               | DB03017 | Approved;<br>Exper        | 0.148  | 1.946 | -4.874  | I | 0.008 |
| Spermine                                  | DB00127 | Exper;<br>Nutraceutical   | 0.161  | 1.946 | -4.874  | I | 0.008 |

|                                                      |         |                      |       |       |         |   |       |
|------------------------------------------------------|---------|----------------------|-------|-------|---------|---|-------|
| Quaternium-24                                        | DB13969 | Exper                | 0.164 | 2.773 | -2.462  | I | 0.079 |
| Rifapentine                                          | DB01201 | Approved;<br>Invest. | 0.328 | 6.019 | 7.006   | A | 0.999 |
| Tetraglyme                                           | DB14000 | Exper                | 0.353 | 2.079 | -4.484  | I | 0.011 |
| 3,6,9,12,15-pentaoxaheptadecan-1-ol                  | DB07344 | Exper                | 0.471 | 2.398 | -3.555  | I | 0.028 |
| 5-(2-hydroxyethyl)nonane-1,9-diol                    | DB07171 | Exper                | 0.541 | 1.792 | -5.323  | I | 0.005 |
| Triglyme                                             | DB02078 | Exper                | 0.620 | 1.609 | -5.855  | I | 0.003 |
| decane-1-thiol                                       | DB07611 | Exper                | 0.704 | 1.386 | -6.506  | I | 0.001 |
| tetrabutylammonium ion                               | DB01851 | Exper                | 0.711 | 1.946 | -4.874  | I | 0.008 |
| undecylenic acid                                     | DB11117 | Approved;<br>Invest. | 0.719 | 1.792 | -5.323  | I | 0.005 |
| 1-dodecanol                                          | DB06894 | Exper                | 0.953 | 1.792 | -5.323  | I | 0.005 |
| bis(hexamethylene)triamine                           | DB04684 | Exper                | 0.953 | 2.079 | -4.484  | I | 0.011 |
| N-ethyl-N-[3-(propylamino)propyl]propane-1,3-diamine | DB04633 | Exper                | 1.098 | 1.946 | -4.874  | I | 0.008 |
| Cetyl alcohol                                        | DB09494 | Approved             | 1.134 | 2.303 | -3.833  | I | 0.021 |
| Undecanal                                            | DB04093 | Exper                | 1.413 | 1.609 | -5.855  | I | 0.003 |
| 2-[2-[2-2-(Methoxy-Ethoxy)-Ethoxy]-Ethoxy]-Ethanol   | DB04332 | Exper                | 1.578 | 1.946 | -4.874  | I | 0.008 |
| Trolamine salicylate                                 | DB11079 | Approved             | 1.736 | 1.099 | -7.345  | I | 0.001 |
| MDL72527                                             | DB04188 | Exper                | 1.843 | 1.946 | -4.874  | I | 0.008 |
| Nonan-1-ol                                           | DB03143 | Exper                | 1.980 | 1.099 | -7.345  | I | 0.001 |
| Hydrogen peroxide                                    | DB11091 | Approved;<br>Vet     | 2.196 | 0.000 | -10.550 | I | 0.000 |
| Triethylene glycol                                   | DB02327 | Exper                | 2.428 | 1.099 | -7.345  | I | 0.001 |

Exper.Exper.; Invest. Investigational; vet: vet approved;A:active;I:Inactive.

**Table S2.** DF<sub>Class\_6LU7</sub> external set: compounds identification, 6LU7 Mpro docking score, descriptors value, classification and probability of being classified as active.

| Compound                                                                                                                                                                                  | Drugbank id. | Drugbank category | Docking score (6LU7) | MPC08 | DF <sub>Class_6LU7</sub> | Class. | P.A.  |
|-------------------------------------------------------------------------------------------------------------------------------------------------------------------------------------------|--------------|-------------------|----------------------|-------|--------------------------|--------|-------|
| Active group                                                                                                                                                                              |              |                   |                      |       |                          |        |       |
| Coenzyme F420                                                                                                                                                                             | DB03913      | Exper.            | -10.613              | 5.521 | 5.556                    | A      | 0.996 |
| Bleomycin                                                                                                                                                                                 | DB00290      | Approved; Invest. | -10.150              | 6.033 | 7.049                    | A      | 0.999 |
| Coa-S-Acetyl 5-Bromotryptamine                                                                                                                                                            | DB03341      | Exper.            | -10.141              | 4.905 | 3.759                    | A      | 0.977 |
| Carbobenzoxo-Pro-Lys-Phe-Y(Po2)-Ala-Pro-Ome                                                                                                                                               | DB01989      | Exper.            | -10.073              | 5.384 | 5.157                    | A      | 0.994 |
| Icatibant                                                                                                                                                                                 | DB06196      | Approved; Invest. | -9.686               | 5.666 | 5.979                    | A      | 0.997 |
| BV2                                                                                                                                                                                       | DB02574      | Exper.            | -9.526               | 5.617 | 5.834                    | A      | 0.997 |
| Glutathionylspermidine Disulfide                                                                                                                                                          | DB02553      | Exper.            | -9.501               | 5.724 | 6.146                    | A      | 0.998 |
| Angiotensinamide                                                                                                                                                                          | DB13517      | Exper.            | -9.137               | 5.464 | 5.388                    | A      | 0.995 |
| CBZ-LEU-LEU-TYR-CH2F                                                                                                                                                                      | DB04653      | Exper.            | -9.039               | 5.635 | 5.887                    | A      | 0.997 |
| 8-epi-Cyanocobalamin                                                                                                                                                                      | DB14092      | Exper.            | -8.959               | 5.464 | 5.388                    | A      | 0.995 |
| 9-hydroxy-6-(3-hydroxypropyl)-4-(2-methoxyphenyl)pyrrolo[3,4-c]carbazole-1,3(2h,6h)-dione                                                                                                 | DB07006      | Exper.            | -8.908               | 5.236 | 4.725                    | A      | 0.991 |
| Enalkiren                                                                                                                                                                                 | DB03395      | Exper.            | -8.824               | 4.754 | 3.316                    | A      | 0.965 |
| Suramin                                                                                                                                                                                   | DB04786      | Invest.           | -8.687               | 4.205 | 1.715                    | A      | 0.848 |
| N-{1-[5-(1-Carbamoyl-2-Mercapto-Ethylcarbamoyl)-Pentylcarbamoyl]-2-[4-(Difluoro-Phosphono-Methyl)-Phenyl]-Ethyl]-3-[2-[4-(Difluoro-Phosphono-Methyl)-Phenyl]-Acetylamino]-Succinamic Acid | DB03557      | Exper.            | -8.617               | 5.501 | 5.497                    | A      | 0.996 |
| 2-(Carboxymethoxy)-5-[(2s)-2-(((2s)-2-[(3-Carboxypropanoyl)Amino] -3-Phenylpropanoyl)Amino)-3-Oxo-3-(Pentylamino)Propyl]Benzoic Acid                                                      | DB04525      | Exper.            | -8.552               | 4.804 | 3.463                    | A      | 0.970 |
| Delparantag                                                                                                                                                                               | DB12955      | Invest.           | -8.481               | 5.293 | 4.891                    | A      | 0.993 |
| Inhibitor Msa367                                                                                                                                                                          | DB03803      | Exper.            | -8.216               | 5.771 | 6.285                    | A      | 0.998 |
| Fosaprepitant                                                                                                                                                                             | DB06717      | Approved          | -8.187               | 5.787 | 6.330                    | A      | 0.998 |
| Isavuconazonium                                                                                                                                                                           | DB06636      | Approved; Invest. | -8.186               | 5.602 | 5.791                    | A      | 0.997 |
| Sincalide                                                                                                                                                                                 | DB09142      | Approved          | -8.181               | 5.384 | 5.157                    | A      | 0.994 |
| 4-Benzoylamino-4-{1-[1-Carbamoyl-2-[4-(Difluoro-Phosphono-Methyl)-Phenyl]-Ethylcarbamoyl]-2-[4-(Difluoro-Phosphono-Methyl)-Phenyl]-                                                       | DB03483      | Exper.            | -8.159               | 5.347 | 5.048                    | A      | 0.994 |



|                                                 |         |                                     |        |       |         |   |       |
|-------------------------------------------------|---------|-------------------------------------|--------|-------|---------|---|-------|
| Ethylcarbamoyl)-Butyric Acid                    |         |                                     |        |       |         |   |       |
| LFA703                                          | DB03932 | Exper.                              | -8.124 | 5.700 | 6.078   | A | 0.998 |
| Difelikefalin                                   | DB11938 | Invest.                             | -8.105 | 5.609 | 5.813   | A | 0.997 |
| Iomeprol                                        | DB11705 | Approved;<br>Invest.                | -8.060 | 5.541 | 5.614   | A | 0.996 |
| 4-(N,N-Dimethylamino)Cinnamoyl-Coa              | DB04117 | Exper.                              | -8.055 | 6.685 | 8.949   | A | 1.000 |
| Rotigaptide                                     | DB13067 | Invest.                             | -8.031 | 5.464 | 5.388   | A | 0.995 |
| <b>Inactive Group</b>                           |         |                                     |        |       |         |   |       |
| Glycine                                         | DB00145 | Approved;<br>Nutraceutical<br>; Vet | -1.960 | 0.000 | -10.550 | I | 0.000 |
| Aluminium glycinate                             | DB13626 | Exper.                              | -1.956 | 0.000 | -10.550 | I | 0.000 |
| Argininosuccinate                               | DB02267 | Exper.                              | -1.864 | 2.639 | -2.852  | I | 0.055 |
| 1-Monohexanoyl-2-Hydroxy-Sn-Glycero-3-Phosphate | DB04199 | Exper.                              | -1.848 | 2.485 | -3.302  | I | 0.036 |
| (5r)-5-Amino-6-Hydroxyhexylcarbamic Acid        | DB02437 | Exper.                              | -1.764 | 1.792 | -5.323  | I | 0.005 |
| Hypophosphite                                   | DB04053 | Exper.                              | -1.739 | 0.000 | -10.550 | I | 0.000 |
| Nitroarginine                                   | DB04223 | Exper.;<br>Invest.                  | -1.691 | 2.197 | -4.141  | I | 0.016 |
| 3-(1-Aminoethyl)Nonanedioic Acid                | DB02941 | Exper.                              | -1.637 | 2.303 | -3.833  | I | 0.021 |
| N-omega-nitro-L-arginine methyl ester           | DB12750 | Invest.                             | -1.523 | 2.303 | -3.833  | I | 0.021 |
| 1-(4-hexylphenyl)prop-2-en-1-one                | DB08085 | Exper.                              | -1.409 | 2.079 | -4.484  | I | 0.011 |
| 1-decane-sulfonic-acid                          | DB06893 | Exper.                              | -1.332 | 1.946 | -4.874  | I | 0.008 |
| OTX-008                                         | DB13123 | Invest.                             | -1.311 | 5.855 | 6.529   | A | 0.999 |
| Ethambutol                                      | DB00330 | Approved                            | -1.241 | 2.197 | -4.141  | I | 0.016 |
| Linoleic acid                                   | DB14104 | Approved;<br>Exper.                 | -1.226 | 2.565 | -3.068  | I | 0.044 |
| Propatyl nitrate                                | DB13255 | Exper.;<br>Invest.                  | -1.221 | 2.565 | -3.068  | I | 0.044 |
| Lauryl Dimethylamine-N-Oxide                    | DB04147 | Exper.                              | -1.185 | 2.197 | -4.141  | I | 0.016 |
| Stearic acid                                    | DB03193 | Approved;<br>Exper.                 | -1.174 | 2.565 | -3.068  | I | 0.044 |
| methoxyundecylphosphinic acid                   | DB08222 | Exper.                              | -1.085 | 2.197 | -4.141  | I | 0.016 |
| Decyl(dimethyl)phosphine oxide                  | DB07641 | Exper.                              | -1.053 | 1.946 | -4.874  | I | 0.008 |
| 4r-Fluoro-N6-Ethanimidoyl-L-Lysine              | DB01835 | Exper.                              | -0.926 | 1.946 | -4.874  | I | 0.008 |
| S-nonyl-cysteine                                | DB07849 | Exper.                              | -0.898 | 2.197 | -4.141  | I | 0.016 |
| 4-Oxosebacic Acid                               | DB02260 | Exper.                              | -0.810 | 2.197 | -4.141  | I | 0.016 |
| Undecyl-Phosphinic Acid Butyl Ester             | DB02457 | Exper.                              | -0.770 | 2.398 | -3.555  | I | 0.028 |
| Octyldodecanol                                  | DB14134 | Exper.                              | -0.461 | 2.773 | -2.462  | I | 0.079 |
| 2-octyl cyanoacrylate                           | DB12040 | Invest.                             | -0.429 | 1.946 | -4.874  | I | 0.008 |

|                                                    |         |                          |        |       |         |   |       |
|----------------------------------------------------|---------|--------------------------|--------|-------|---------|---|-------|
| Diethylhomospermine                                | DB13011 | Invest.                  | -0.337 | 2.565 | -3.068  | I | 0.044 |
| 11-mercaptoundecanoic acid                         | DB08171 | Exper.                   | -0.318 | 1.946 | -4.874  | I | 0.008 |
| 2-(2-[2-(2-Methoxy-Ethoxy)-Ethoxy]-Ethoxy)-Ethanol | DB02042 | Exper.                   | -0.253 | 2.303 | -3.833  | I | 0.021 |
| Palmidrol                                          | DB14043 | Exper.;<br>Nutraceutical | -0.168 | 2.639 | -2.852  | I | 0.055 |
| undecan-2-one                                      | DB08688 | Exper.                   | -0.039 | 1.609 | -5.855  | I | 0.003 |
| N-Tridecanoic Acid                                 | DB02448 | Exper.                   | 0.042  | 2.079 | -4.484  | I | 0.011 |
| Myristic acid                                      | DB08231 | Exper.                   | 0.072  | 2.197 | -4.141  | I | 0.016 |
| Capric acid                                        | DB03600 | Exper.                   | 0.106  | 1.609 | -5.855  | I | 0.003 |
| Diethylnorspermine                                 | DB06445 | Invest.                  | 0.113  | 2.303 | -3.833  | I | 0.021 |
| N-Octyl-2-Hydroxyethyl Sulfoxide                   | DB02415 | Exper.                   | 0.151  | 1.792 | -5.323  | I | 0.005 |
| Tilarginine                                        | DB11815 | Approved;<br>Invest.     | 0.199  | 1.946 | -4.874  | I | 0.008 |
| 1-ethoxy-2-(2-ethoxyethoxy)ethane                  | DB08357 | Exper.                   | 0.676  | 1.386 | -6.506  | I | 0.001 |
| hexadecanal                                        | DB03381 | Exper.                   | 0.752  | 2.303 | -3.833  | I | 0.021 |
| decyl formate                                      | DB07650 | Exper.                   | 0.902  | 1.792 | -5.323  | I | 0.005 |
| 1-(hydroxymethyleneamino)-8-hydroxy-octane         | DB07897 | Exper.                   | 1.075  | 1.609 | -5.855  | I | 0.003 |
| Trolamine                                          | DB13747 | Approved                 | 1.747  | 0.000 | -10.550 | I | 0.000 |
| Coumermycin A1                                     | DB13912 | Exper.                   | 2.909  | 6.211 | 7.566   | A | 0.999 |

Exper. Exper. ; Invest. Investigational; vet: vet approved

**Table S3.** ANN<sub>Class\_6LU7</sub> training set: compounds identification, 6LU7 Mpro docking score, descriptors value, classification and confidence level associated.

| Compound                                                                                                                                                                  | Docking score (6LU7) | MPC08 | ANN <sub>Class_6LU7</sub> Class. | Conf. levels |
|---------------------------------------------------------------------------------------------------------------------------------------------------------------------------|----------------------|-------|----------------------------------|--------------|
| Active group                                                                                                                                                              |                      |       |                                  |              |
| Gonadorelin                                                                                                                                                               | -11.695              | 5.684 | A                                | 0.873        |
| Ornipressin                                                                                                                                                               | -11.367              | 5.609 | A                                | 0.873        |
| Felypressin                                                                                                                                                               | -10.94               | 4.956 | A                                | 0.872        |
| Carbetocin                                                                                                                                                                | -10.381              | 5.380 | A                                | 0.873        |
| (E)-(4S,6S)-6-((S)-2-[(furan-2-carbonyl)-amino]-3-methyl-butylamino)-3-methyl-butylamino)-8-methyl-5-oxo-4-((r)-2-oxo-pyrrolidin-3-ylmethyl)-non-2-enoic acid ethyl ester | -10.222              | 5.897 | A                                | 0.873        |
| Iotrolan                                                                                                                                                                  | -10.176              | 4.605 | A                                | 0.869        |
| Lypressin                                                                                                                                                                 | -10.107              | 5.513 | A                                | 0.873        |
| Triptorelin                                                                                                                                                               | -10.045              | 5.945 | A                                | 0.873        |
| Lanreotide                                                                                                                                                                | -9.973               | 4.956 | A                                | 0.872        |
| Birinapant                                                                                                                                                                | -9.893               | 6.084 | A                                | 0.873        |
| Indium In-111 pentetreotide                                                                                                                                               | -9.877               | 6.116 | A                                | 0.873        |
| Ipamorelin                                                                                                                                                                | -9.873               | 4.754 | A                                | 0.870        |
| UK-432097                                                                                                                                                                 | -9.697               | 5.756 | A                                | 0.873        |
| Pentagastrin                                                                                                                                                              | -9.648               | 4.984 | A                                | 0.872        |
| Terlipressin                                                                                                                                                              | -9.511               | 6.192 | A                                | 0.873        |
| Succinamide-CoA                                                                                                                                                           | -9.472               | 5.493 | A                                | 0.873        |
| Iopamidol                                                                                                                                                                 | -9.397               | 5.464 | A                                | 0.873        |
| BV1                                                                                                                                                                       | -9.387               | 5.549 | A                                | 0.873        |
| Labradimil                                                                                                                                                                | -9.377               | 5.371 | A                                | 0.873        |
| Etelcalcetide                                                                                                                                                             | -9.353               | 4.942 | A                                | 0.872        |
| LY231514 Tetra Glu                                                                                                                                                        | -9.318               | 4.812 | A                                | 0.871        |
| talactoferrin alpha                                                                                                                                                       | -9.217               | 5.333 | A                                | 0.873        |
| 8-Demethyl-8-Dimethylamino-Flavin-Adenine-Dinucleotide                                                                                                                    | -9.206               | 4.533 | A                                | 0.867        |
| N-(Sulfanylacetyl)Tyrosylprolylmethioninamide                                                                                                                             | -9.162               | 3.970 | A                                | 0.819        |
| Colistin                                                                                                                                                                  | -9.125               | 5.357 | A                                | 0.873        |
| 4'-nitrophenyl-3i-thiolaminaritrioxide                                                                                                                                    | -9.014               | 5.858 | A                                | 0.873        |
| Hydroxyethyl cellulose                                                                                                                                                    | -9.014               | 5.684 | A                                | 0.873        |
| S-(2-Oxo)Pentadecylcoa                                                                                                                                                    | -9                   | 5.069 | A                                | 0.872        |
| 4-Hydroxyphenacyl Coenzyme A                                                                                                                                              | -8.999               | 5.416 | A                                | 0.873        |
| CoA-S-Acetyl Tryptamine                                                                                                                                                   | -8.927               | 5.541 | A                                | 0.873        |
| Vapreotide                                                                                                                                                                | -8.904               | 5.762 | A                                | 0.873        |
| Adrabetadex                                                                                                                                                               | -8.894               | 6.436 | A                                | 0.873        |
| Thymopentin                                                                                                                                                               | -8.889               | 4.554 | A                                | 0.868        |
| Saquinavir                                                                                                                                                                | -8.844               | 5.403 | A                                | 0.873        |
| 3-Thiaoctanoyl-Coenzyme A                                                                                                                                                 | -8.745               | 4.007 | A                                | 0.827        |

|                                                                                                        |        |       |   |       |
|--------------------------------------------------------------------------------------------------------|--------|-------|---|-------|
| 4-methyl-pentanoic acid {1-[4-guanidino-1-(thiazole-2-carbonyl)-butylcarbamoyl]-2-methyl-propyl}-amide | -8.745 | 5.580 | A | 0.873 |
| Sinapoyl Coenzyme A                                                                                    | -8.736 | 4.984 | A | 0.872 |
| P1-(5'-Adenosyl)P5-(5'-Thymidyl)Pentaphosphate                                                         | -8.726 | 4.500 | A | 0.867 |
| Dotatate                                                                                               | -8.708 | 5.509 | A | 0.873 |
| 3-[3-(2,3-Dihydroxy-Propylamino)-Phenyl]-4-(5-Fluoro-1-Methyl-1h-Indol-3-Yl)-Pyrrole-2,5-Dione         | -8.697 | 5.063 | A | 0.872 |
| Iobitridol                                                                                             | -8.697 | 5.112 | A | 0.872 |
| Angiotensin II                                                                                         | -8.674 | 5.485 | A | 0.873 |
| Flavin adenine dinucleotide                                                                            | -8.539 | 5.476 | A | 0.873 |
| Iodixanol                                                                                              | -8.538 | 5.017 | A | 0.872 |
| Sufugolix                                                                                              | -8.501 | 4.234 | A | 0.855 |
| Elamipretide                                                                                           | -8.476 | 5.768 | A | 0.873 |
| Flavin-N7 Protonated-Adenine Dinucleotide                                                              | -8.446 | 5.976 | A | 0.873 |
| Alatrofloxacin                                                                                         | -8.428 | 5.704 | A | 0.873 |
| Methylmalonyl-Coenzyme A                                                                               | -8.428 | 5.004 | A | 0.872 |
| Coa-S-Trimethylene-Acetyl-Tryptamine                                                                   | -8.422 | 5.513 | A | 0.873 |
| Trifluoroacetyl Coenzyme A                                                                             | -8.388 | 5.624 | A | 0.873 |
| Je-2147, Ag1776, Kni-764                                                                               | -8.329 | 5.198 | A | 0.872 |
| Giripladib                                                                                             | -8.314 | 4.779 | A | 0.871 |
| Efrotomycin                                                                                            | -8.288 | 4.615 | A | 0.869 |
| 3-[1-(3-aminopropyl)-1h-indol-3-yl]-4-(1h-indol-3-yl)-1h-pyrrole-2,5-dione                             | -8.259 | 5.347 | A | 0.873 |
| Fosifloxuridine nafalbenamide                                                                          | -8.25  | 5.268 | A | 0.873 |
| HM-30181                                                                                               | -8.238 | 4.466 | A | 0.866 |
| 2-Hydroxy-5-([1-[(4-Methylphenoxy)Methyl]-3-Oxoprop-1-Enyl]Amino)-L-Tyrosine                           | -8.232 | 4.277 | A | 0.858 |
| Caspofungin                                                                                            | -8.208 | 4.927 | A | 0.872 |
| Benzoyl-Arginine-Alanine-Methyl Ketone                                                                 | -8.2   | 3.761 | A | 0.735 |
| Inhibitor Bea388                                                                                       | -8.191 | 5.493 | A | 0.873 |
| 3-[(5s)-1-Acetyl-3-(2-Chlorophenyl)-4,5-Dihydro-1h-Pyrazol-5-Yl]Phenol                                 | -8.186 | 5.380 | A | 0.873 |
| Cefbuperazone                                                                                          | -8.171 | 4.500 | A | 0.867 |
| Telnavir                                                                                               | -8.164 | 5.961 | A | 0.873 |
| Nicotinamide-Adenine-Dinucleotide-5-Hydroxy-4-Oxonorvaline                                             | -8.154 | 5.609 | A | 0.873 |
| Cangrelor                                                                                              | -8.151 | 5.557 | A | 0.873 |
| Polymyxin B                                                                                            | -8.149 | 5.489 | A | 0.873 |
| N-(4-carbamimidoylbenzyl)-1-(4-methylpentanoyl)-L-prolinamide                                          | -8.129 | 5.338 | A | 0.873 |
| NUC-1031                                                                                               | -8.118 | 4.949 | A | 0.872 |
| Larazotide                                                                                             | -8.117 | 5.533 | A | 0.873 |
| Inarigivir soproxil                                                                                    | -8.105 | 5.677 | A | 0.873 |
| Cephalosporin Analog                                                                                   | -8.077 | 5.308 | A | 0.873 |
| FR236913                                                                                               | -8.056 | 5.176 | A | 0.872 |
| TOP-1288                                                                                               | -8.054 | 4.883 | A | 0.871 |

|                                                                            |        |       |   |       |
|----------------------------------------------------------------------------|--------|-------|---|-------|
| Ioforminol                                                                 | -8.05  | 4.762 | A | 0.871 |
| Dirlotapide                                                                | -8.034 | 4.898 | A | 0.872 |
| BMS-986094                                                                 | -8.021 | 6.033 | A | 0.873 |
| Iopentol                                                                   | -8.016 | 4.543 | A | 0.868 |
| Carfilzomib                                                                | -8.009 | 5.056 | A | 0.872 |
| 4-Oxo-Nicotinamide-Adenine Dinucleotide Phosphate                          | -8.002 | 5.919 | A | 0.873 |
| <b>Inactive group</b>                                                      |        |       |   |       |
| Agmatine                                                                   | -2.000 | 0.000 | I | 1.000 |
| 1-acetyl-2-lyso-sn-glycero-3-phosphoethanolamine                           | -1.961 | 2.398 | I | 1.000 |
| Glycerin                                                                   | -1.961 | 0.000 | I | 1.000 |
| Magnesium glycinate                                                        | -1.96  | 0.000 | I | 1.000 |
| Zinc glycinate                                                             | -1.96  | 0.000 | I | 1.000 |
| Aluminum zirconium octachlorohydrate gly                                   | -1.956 | 0.000 | I | 1.000 |
| Dihydroxyacetone                                                           | -1.956 | 0.000 | I | 1.000 |
| Ferrous glycine sulfate                                                    | -1.956 | 0.000 | I | 1.000 |
| (S)-2-Amino-4-[(2S,3R)-2,3,5-Trihydroxy-4-Oxo-Pentyl]Mercapto-Butyric Acid | -1.908 | 2.485 | I | 1.000 |
| 1,4-Butanediol                                                             | -1.859 | 0.000 | I | 1.000 |
| Amyl Nitrite                                                               | -1.822 | 0.000 | I | 1.000 |
| 3-Oxo-Pentadecanoic Acid                                                   | -1.815 | 2.398 | I | 1.000 |
| 4-Hydroxybutan-1-Aminium                                                   | -1.809 | 0.000 | I | 1.000 |
| NB-001                                                                     | -1.783 | 3.807 | A | 0.761 |
| L-cystein-s-1-(iminomethyl)-l-ornithine                                    | -1.733 | 2.485 | I | 1.000 |
| L-Alpha-Glycerophosphorylserine                                            | -1.729 | 2.079 | I | 1.000 |
| 2-Hydroxyethyl Disulfide                                                   | -1.698 | 0.000 | I | 1.000 |
| Ricinoleic Acid                                                            | -1.612 | 2.639 | I | 1.000 |
| cis-Vaccenic acid                                                          | -1.61  | 2.565 | I | 1.000 |
| Tylosin                                                                    | -1.587 | 5.568 | A | 0.873 |
| Dexpanthenol                                                               | -1.578 | 1.609 | I | 1.000 |
| Nz-(1-Carboxyethyl)-Lysine                                                 | -1.566 | 2.197 | I | 1.000 |
| Troleandomycin                                                             | -1.566 | 5.513 | A | 0.873 |
| N-(Phosphonoacetyl)-L-Ornithine                                            | -1.542 | 2.303 | I | 1.000 |
| Sevelamer                                                                  | -1.522 | 0.000 | I | 1.000 |
| 3,7,11,15-tetramethyl-hexadecan-1-ol                                       | -1.515 | 2.708 | I | 1.000 |
| Nz-(Dicarboxymethyl)Lysine                                                 | -1.508 | 2.398 | I | 1.000 |
| L-Alpha-Glycerophosphorylethanolamine                                      | -1.502 | 1.386 | I | 1.000 |
| 1,3-Propandiol                                                             | -1.482 | 0.000 | I | 1.000 |
| N-Alpha-L-Acetyl-Arginine                                                  | -1.475 | 2.197 | I | 1.000 |
| Methylethylamine                                                           | -1.437 | 0.000 | I | 1.000 |
| (9Z,11E,13S)-13-hydroxyoctadeca-9,11-dienoic acid                          | -1.41  | 2.639 | I | 1.000 |
| (3R)-3-hydroxydodecanoic acid                                              | -1.409 | 2.944 | I | 1.000 |
| N-Butyl-N'-Hydroxyguanidine                                                | -1.371 | 0.000 | I | 1.000 |
| 2-Decenoyl N-Acetyl Cysteamine                                             | -1.357 | 2.398 | I | 1.000 |

|                                                                                               |        |       |   |       |
|-----------------------------------------------------------------------------------------------|--------|-------|---|-------|
| 4-amino-n-[(2-sulfanylethyl)carbamoyl]benzenesulfonamide                                      | -1.335 | 2.833 | I | 1.000 |
| Cimetidine                                                                                    | -1.306 | 2.773 | I | 1.000 |
| undecylamine-n,n-dimethyl-n-oxide                                                             | -1.302 | 2.079 | I | 1.000 |
| MF268                                                                                         | -1.288 | 2.944 | I | 1.000 |
| Triethoxycaprylylsilane                                                                       | -1.283 | 2.398 | I | 1.000 |
| Ethyl Isocyanide                                                                              | -1.203 | 0.000 | I | 1.000 |
| Alpha-linolenic acid                                                                          | -1.198 | 2.565 | I | 1.000 |
| Sodium lauryl sulfate                                                                         | -1.178 | 2.303 | I | 1.000 |
| Dodecyl sulfate                                                                               | -1.174 | 2.197 | I | 1.000 |
| Magnesium stearate                                                                            | -1.174 | 3.219 | I | 0.988 |
| Guanidine-3-Propanol                                                                          | -1.153 | 0.000 | I | 1.000 |
| Dolastatin 10                                                                                 | -1.137 | 5.030 | A | 0.872 |
| (10E,12Z)-octadecadienoic acid                                                                | -1.114 | 2.565 | I | 1.000 |
| S-(D-Carboxybutyl)-L-Homocysteine                                                             | -1.108 | 2.079 | I | 1.000 |
| N2-(Carboxyethyl)-L-Arginine                                                                  | -1.104 | 2.398 | I | 1.000 |
| diethyl propane-1,3-diylbiscarbamate                                                          | -1.072 | 2.197 | I | 1.000 |
| GW-274150                                                                                     | -1.06  | 1.946 | I | 1.000 |
| Etoglucid                                                                                     | -1.057 | 2.708 | I | 1.000 |
| Palmitoleic Acid                                                                              | -1.019 | 2.398 | I | 1.000 |
| Odalasvir                                                                                     | -1.013 | 6.526 | A | 0.873 |
| 3-Hydroxy-Myristic Acid                                                                       | -1.002 | 2.303 | I | 1.000 |
| Nitrosoethane                                                                                 | -0.974 | 0.000 | I | 1.000 |
| Elaidoylamide                                                                                 | -0.953 | 2.565 | I | 1.000 |
| Bromo-Dodecanol                                                                               | -0.947 | 1.946 | I | 1.000 |
| Ethylhexylglycerin                                                                            | -0.914 | 1.792 | I | 1.000 |
| Rifampicin                                                                                    | -0.888 | 5.958 | A | 0.873 |
| 1-Guanidinium-7-Aminoheptane                                                                  | -0.881 | 1.609 | I | 1.000 |
| Ethanolamine oleate                                                                           | -0.866 | 2.565 | I | 1.000 |
| Ethanol                                                                                       | -0.776 | 0.000 | I | 1.000 |
| C31G                                                                                          | -0.753 | 2.996 | I | 1.000 |
| n-dodecyl-n,n-dimethylglycinate                                                               | -0.753 | 2.485 | I | 1.000 |
| 5-N-Allyl-Arginine                                                                            | -0.752 | 2.197 | I | 1.000 |
| Hexaminolevulinate                                                                            | -0.718 | 2.079 | I | 1.000 |
| Cetrimonium                                                                                   | -0.607 | 2.565 | I | 1.000 |
| Dibutylsuccinate                                                                              | -0.599 | 2.197 | I | 1.000 |
| 2-[3-(2-Hydroxy-1,1-Dihydroxymethyl-Ethylamino)-Propylamino]-2-Hydroxymethyl-Propane-1,3-Diol | -0.567 | 2.773 | I | 1.000 |
| Tiadenol                                                                                      | -0.524 | 2.398 | I | 1.000 |
| N5-(1-Imino-3-Butenyl)-L-Ornithine                                                            | -0.514 | 2.079 | I | 1.000 |
| 3,6,9,12,15-Pentaoxaheptadecane                                                               | -0.513 | 2.303 | I | 1.000 |
| N-Omega-Propyl-L-Arginine                                                                     | -0.511 | 2.197 | I | 1.000 |
| Diocetylmonium                                                                                | -0.501 | 2.639 | I | 1.000 |
| Decamethonium                                                                                 | -0.471 | 2.398 | I | 1.000 |

|                                                      |        |       |   |       |
|------------------------------------------------------|--------|-------|---|-------|
| 11-[(mercaptocarbonyl)oxy]undecanoic acid            | -0.459 | 2.398 | I | 1.000 |
| N-Omega-Hydroxy-L-Arginine                           | -0.453 | 2.303 | I | 1.000 |
| Dodecane-Trimethylamine                              | -0.414 | 1.946 | I | 1.000 |
| Hydroxybutyloxide                                    | -0.41  | 2.197 | I | 1.000 |
| Tris(Hydroxyethyl)Aminomethane                       | -0.395 | 1.609 | I | 1.000 |
| Lauroyl chloride                                     | -0.364 | 0.000 | I | 1.000 |
| 12-Hydroxydodecanoic Acid                            | -0.358 | 1.946 | I | 1.000 |
| Diethylhomospermine                                  | -0.348 | 2.079 | I | 1.000 |
| Oleic Acid                                           | -0.337 | 1.609 | I | 1.000 |
| Silanol                                              | -0.319 | 2.565 | I | 1.000 |
| N3, N4-Dimethylarginine                              | -0.311 | 0.000 | I | 1.000 |
| Pentaglyme                                           | -0.295 | 2.197 | I | 1.000 |
| Ocrylate                                             | -0.221 | 2.398 | I | 1.000 |
| Isopropyl myristate                                  | -0.198 | 2.079 | I | 1.000 |
| Monoctanoin                                          | -0.188 | 2.485 | I | 1.000 |
| 3,6,9,12,15,18-hexaoxaicosane                        | -0.151 | 2.079 | I | 1.000 |
| Vinyl ether                                          | -0.112 | 2.565 | I | 1.000 |
| NCX 701                                              | -0.108 | 0.000 | I | 1.000 |
| Trolnitrate                                          | -0.094 | 3.367 | I | 0.867 |
| Methyl Nonanoate (Ester)                             | -0.094 | 2.773 | I | 1.000 |
| Palmitic Acid                                        | -0.084 | 1.609 | I | 1.000 |
| sebacic acid                                         | -0.081 | 2.398 | I | 1.000 |
| Azelaic acid                                         | -0.07  | 1.946 | I | 1.000 |
| Bombykol                                             | -0.064 | 1.792 | I | 1.000 |
| Nitrous acid                                         | -0.004 | 2.303 | I | 1.000 |
| L-Homoarginine                                       | 0.022  | 0.000 | I | 1.000 |
| O-Decyl Hydrogen Thiocarbonate                       | 0.04   | 1.946 | I | 1.000 |
| Lauric acid                                          | 0.106  | 1.946 | I | 1.000 |
| Spermine                                             | 0.148  | 1.946 | I | 1.000 |
| Quaternium-24                                        | 0.161  | 1.946 | I | 1.000 |
| Rifapentine                                          | 0.164  | 2.773 | I | 1.000 |
| Tetraglyme                                           | 0.328  | 6.019 | A | 0.873 |
| 3,6,9,12,15-pentaoxaheptadecan-1-ol                  | 0.353  | 2.079 | I | 1.000 |
| 5-(2-hydroxyethyl)nonane-1,9-diol                    | 0.541  | 1.792 | I | 1.000 |
| Triglyme                                             | 0.62   | 1.609 | I | 1.000 |
| decane-1-thiol                                       | 0.704  | 1.386 | I | 1.000 |
| tetrabutylammonium ion                               | 0.711  | 1.946 | I | 1.000 |
| undecylenic acid                                     | 0.719  | 1.792 | I | 1.000 |
| 1-dodecanol                                          | 0.953  | 1.792 | I | 1.000 |
| bis(hexamethylene)triamine                           | 0.953  | 2.079 | I | 1.000 |
| N-ethyl-N-[3-(propylamino)propyl]propane-1,3-diamine | 1.098  | 1.946 | I | 1.000 |
| Cetyl alcohol                                        | 1.134  | 2.303 | I | 1.000 |
| Undecanal                                            | 1.413  | 1.609 | I | 1.000 |

|                                                    |       |       |   |       |
|----------------------------------------------------|-------|-------|---|-------|
| 2-[2-[2-2-(Methoxy-Ethoxy)-Ethoxy]-Ethoxy]-Ethanol | 1.578 | 1.946 | I | 1.000 |
| Trolamine salicylate                               | 1.736 | 1.099 | I | 1.000 |
| MDL72527                                           | 1.843 | 1.946 | I | 1.000 |
| Nonan-1-ol                                         | 1.98  | 1.099 | I | 1.000 |
| Hydrogen peroxide                                  | 2.196 | 0.000 | I | 1.000 |
| Triethylene glycol                                 | 2.428 | 1.099 | I | 1.000 |



**Table S4.** ANN<sub>Class\_6LU7</sub> external set: compounds identification, 6LU7 Mpro docking score, descriptors value, classification and confidence level associated.

| Compound                                                                                                                                                                                  | Docking score (6LU7) | MPC08 | ANN <sub>Class_6LU7</sub> Pred | Conf. levels |
|-------------------------------------------------------------------------------------------------------------------------------------------------------------------------------------------|----------------------|-------|--------------------------------|--------------|
| Test Active group                                                                                                                                                                         |                      |       |                                |              |
| Coenzyme F420                                                                                                                                                                             | -10.613              | 5.521 | A                              | 0.873        |
| Bleomycin                                                                                                                                                                                 | -10.150              | 6.033 | A                              | 0.873        |
| Coa-S-Acetyl 5-Bromotryptamine                                                                                                                                                            | -10.141              | 4.905 | A                              | 0.872        |
| Carbobenzoxy-Pro-Lys-Phe-Y(Po2)-Ala-Pro-Ome                                                                                                                                               | -10.073              | 5.384 | A                              | 0.873        |
| Icatibant                                                                                                                                                                                 | -9.686               | 5.666 | A                              | 0.873        |
| BV2                                                                                                                                                                                       | -9.526               | 5.617 | A                              | 0.873        |
| Glutathionylspermidine Disulfide                                                                                                                                                          | -9.501               | 5.724 | A                              | 0.873        |
| Angiotensinamide                                                                                                                                                                          | -9.137               | 5.464 | A                              | 0.873        |
| CBZ-LEU-LEU-TYR-CH2F                                                                                                                                                                      | -9.039               | 5.635 | A                              | 0.873        |
| 8-epi-Cyanocobalamin                                                                                                                                                                      | -8.959               | 5.464 | A                              | 0.873        |
| 9-hydroxy-6-(3-hydroxypropyl)-4-(2-methoxyphenyl)pyrrolo[3,4-c]carbazole-1,3(2h,6h)-dione                                                                                                 | -8.908               | 5.236 | A                              | 0.873        |
| Enalkiren                                                                                                                                                                                 | -8.824               | 4.754 | A                              | 0.870        |
| Suramin                                                                                                                                                                                   | -8.687               | 4.205 | A                              | 0.853        |
| N-{1-[5-(1-Carbamoyl-2-Mercapto-Ethylcarbamoyl)-Pentylcarbamoyl]-2-[4-(Difluoro-Phosphono-Methyl)-Phenyl]-Ethyl}-3-{2-[4-(Difluoro-Phosphono-Methyl)-Phenyl]-Acetylamino}-Succinamic Acid | -8.617               | 5.501 | A                              | 0.873        |
| 2-(Carboxymethoxy)-5-[(2s)-2-[(2s)-2-[(3-Carboxypropanoyl)Amino]-3-Phenylpropanoyl]Amino)-3-Oxo-3-(Pentylamino)Propyl]Benzoic Acid                                                        | -8.552               | 4.804 | A                              | 0.871        |
| Delparantag                                                                                                                                                                               | -8.481               | 5.293 | A                              | 0.873        |
| Inhibitor Msa367                                                                                                                                                                          | -8.216               | 5.771 | A                              | 0.873        |
| Fosaprepitant                                                                                                                                                                             | -8.187               | 5.787 | A                              | 0.873        |
| Isavuconazonium                                                                                                                                                                           | -8.186               | 5.602 | A                              | 0.873        |
| Sincalide                                                                                                                                                                                 | -8.181               | 5.384 | A                              | 0.873        |
| 4-Benzoylamino-4-[1-[1-Carbamoyl-2-[4-(Difluoro-Phosphono-Methyl)-Phenyl]-Ethylcarbamoyl]-2-[4-(Difluoro-Phosphono-Methyl)-Phenyl]-Ethylcarbamoyl]-Butyric Acid                           | -8.159               | 5.347 | A                              | 0.873        |
| LFA703                                                                                                                                                                                    | -8.124               | 5.700 | A                              | 0.873        |
| Difelikefalin                                                                                                                                                                             | -8.105               | 5.609 | A                              | 0.873        |
| Iomeprol                                                                                                                                                                                  | -8.06                | 5.541 | A                              | 0.873        |
| 4-(N,N-Dimethylamino)Cinnamoyl-Coa                                                                                                                                                        | -8.055               | 6.685 | A                              | 0.873        |
| Rotigaptide                                                                                                                                                                               | -8.031               | 5.464 | A                              | 0.873        |
| Test inactive group                                                                                                                                                                       |                      |       |                                |              |
| Glycine                                                                                                                                                                                   | -1.960               | 0.000 | I                              | 1.000        |
| 1-Monohexanoyl-2-Hydroxy-Sn-Glycero-3-Phosphate                                                                                                                                           | -1.848               | 2.485 | I                              | 1.000        |

|                                                               |        |       |   |       |
|---------------------------------------------------------------|--------|-------|---|-------|
| Aluminium glycinate                                           | -1.822 | 0.000 | I | 1.000 |
| (5r)-5-Amino-6-Hydroxyhexylcarbamic Acid                      | -1.764 | 1.792 | I | 1.000 |
| Hypophosphite                                                 | -1.739 | 0.000 | I | 1.000 |
| Nitroarginine                                                 | -1.691 | 2.197 | I | 1.000 |
| 3-(1-Aminoethyl)Nonanedioic Acid                              | -1.637 | 2.303 | I | 1.000 |
| N-omega-nitro-L-arginine methyl ester                         | -1.523 | 2.303 | I | 1.000 |
| 1-decane-sulfonic-acid                                        | -1.332 | 1.946 | I | 1.000 |
| Otx-008                                                       | -1.311 | 5.855 | A | 0.873 |
| Linoleic acid                                                 | -1.226 | 2.565 | I | 1.000 |
| Propatyl nitrate                                              | -1.221 | 2.565 | I | 1.000 |
| Lauryl dimethylamine-n-oxide                                  | -1.185 | 2.197 | I | 1.000 |
| Stearic acid                                                  | -1.174 | 2.565 | I | 1.000 |
| Methoxyundecylphosphinic acid                                 | -1.085 | 2.197 | I | 1.000 |
| Diethylnorspermine                                            | -1.072 | 2.303 | I | 1.000 |
| 4r-Fluoro-N6-Ethanimidoyl-L-Lysine                            | -0.926 | 1.946 | I | 1.000 |
| S-nonyl-cysteine                                              | -0.898 | 2.197 | I | 1.000 |
| 4-Oxosebacic Acid                                             | -0.810 | 2.197 | I | 1.000 |
| Ethambutol                                                    | -0.776 | 2.197 | I | 1.000 |
| Undecyl-Phosphinic Acid Butyl Ester                           | -0.77  | 2.398 | I | 1.000 |
| Octyldodecanol                                                | -0.461 | 2.773 | I | 1.000 |
| 2-octyl cyanoacrylate                                         | -0.429 | 1.946 | I | 1.000 |
| 11-mercaptoundecanoic acid                                    | -0.318 | 1.946 | I | 1.000 |
| 2-(2-{2-[2-(2-Methoxy-Ethoxy)-Ethoxy]-Ethoxy}-Ethoxy)-Ethanol | -0.253 | 2.303 | I | 1.000 |
| Palmidrol                                                     | -0.168 | 2.639 | I | 1.000 |
| undecan-2-one                                                 | -0.039 | 1.609 | I | 1.000 |
| N-Tridecanoic Acid                                            | 0.042  | 2.079 | I | 1.000 |
| Myristic acid                                                 | 0.072  | 2.197 | I | 1.000 |
| N-Octyl-2-Hydroxyethyl Sulfoxide                              | 0.151  | 1.792 | I | 1.000 |
| Tilarginine                                                   | 0.199  | 1.946 | I | 1.000 |
| 1-ethoxy-2-(2-ethoxyethoxy)ethane                             | 0.676  | 1.386 | I | 1.000 |
| Coumermycin A1                                                | 0.704  | 6.211 | A | 0.873 |
| Hexadecanal                                                   | 0.752  | 2.303 | I | 1.000 |
| Argininosuccinate                                             | 0.953  | 2.639 | I | 1.000 |
| 1-(hydroxymethyleneamino)-8-hydroxy-octane                    | 1.075  | 1.609 | I | 1.000 |
| Capric acid                                                   | 1.134  | 1.609 | I | 1.000 |
| Decyl formate                                                 | 1.479  | 1.946 | I | 1.000 |
| Trolamine                                                     | 1.747  | 0.000 | I | 1.000 |

**Table S5.** MLRA<sub>reg\_6LU7</sub> training set: compounds identification, 6LU7 Mpro docking score, descriptors value and 6LU7 Mpro docking score predicted.

| Compound                                                                                                                                                                           | Docking score (6LU7) | SpDiam_EA(bo) | Eig09_EA(bo) | nRNR2 | N-068 | CATS2D_05_LL | nLevel1 | Docking score (6LU7) Predicted |
|------------------------------------------------------------------------------------------------------------------------------------------------------------------------------------|----------------------|---------------|--------------|-------|-------|--------------|---------|--------------------------------|
| Active group                                                                                                                                                                       |                      |               |              |       |       |              |         |                                |
| Gonadorelin                                                                                                                                                                        | -11.695              | 7.474         | 2.998        | 0     | 0     | 6            | 3       | -9.576                         |
| Ornipressin                                                                                                                                                                        | -11.367              | 7.581         | 2.883        | 0     | 0     | 0            | 3       | -10.178                        |
| Felypressin                                                                                                                                                                        | -10.940              | 5.292         | 2.710        | 0     | 0     | 5            | 3       | -7.706                         |
| Carbetocin                                                                                                                                                                         | -10.381              | 7.617         | 2.153        | 0     | 0     | 0            | 3       | -8.918                         |
| (E)-(4s,6s)-6-((s)-2-((s)-2-[(furan-2-carbonyl)-amino]-3-methyl-butrylamino)-3-methyl-butrylamino)-8-methyl-5-oxo-4-((r)-2-oxo-pyrrolidin-3-ylmethyl)-non-2-enoic acid ethyl ester | -10.222              | 7.474         | 3.069        | 4     | 4     | 3            | 3       | -7.411                         |
| Iotrolan                                                                                                                                                                           | -10.176              | 7.505         | 1.360        | 0     | 0     | 0            | 3       | -7.447                         |
| Lypressin                                                                                                                                                                          | -10.107              | 7.524         | 2.376        | 0     | 0     | 28           | 3       | -5.832                         |
| Triptorelin                                                                                                                                                                        | -10.045              | 7.474         | 3.139        | 0     | 0     | 9            | 3       | -9.458                         |
| Lanreotide                                                                                                                                                                         | -9.973               | 7.084         | 2.077        | 0     | 0     | 3            | 3       | -8.056                         |
| Birinapant                                                                                                                                                                         | -9.893               | 7.714         | 2.705        | 0     | 0     | 16           | 3       | -8.003                         |
| Indium In-111 pentetreotide                                                                                                                                                        | -9.877               | 6.848         | 3.050        | 0     | 0     | 8            | 3       | -8.998                         |
| Ipamorelin                                                                                                                                                                         | -9.873               | 7.500         | 2.099        | 0     | 0     | 4            | 3       | -8.255                         |
| UK-432097                                                                                                                                                                          | -9.697               | 7.625         | 2.676        | 0     | 0     | 12           | 3       | -8.381                         |
| Pentagastrin                                                                                                                                                                       | -9.648               | 6.904         | 2.093        | 0     | 0     | 1            | 3       | -8.205                         |
| Terlipressin                                                                                                                                                                       | -9.511               | 7.992         | 3.971        | 0     | 0     | 28           | 0       | -7.619                         |
| Succinamide-Coa                                                                                                                                                                    | -9.472               | 7.474         | 3.012        | 0     | 0     | 6            | 3       | -9.600                         |
| Iopamidol                                                                                                                                                                          | -9.397               | 7.498         | 2.393        | 0     | 0     | 0            | 3       | -9.260                         |
| BV1                                                                                                                                                                                | -9.387               | 7.618         | 2.842        | 0     | 0     | 3            | 3.2     | -9.855                         |
| Labradimil                                                                                                                                                                         | -9.377               | 7.133         | 2.815        | 0     | 0     | 8            | 3.3     | -8.926                         |
| Etelcalcetide                                                                                                                                                                      | -9.353               | 6.645         | 2.506        | 0     | 0     | 5            | 3       | -8.268                         |
| LY231514 Tetra Glu                                                                                                                                                                 | -9.318               | 5.430         | 2.642        | 0     | 0     | 5            | 3       | -7.682                         |
| Talactoferrin alpha                                                                                                                                                                | -9.217               | 7.581         | 2.911        | 0     | 0     | 1            | 3       | -10.105                        |
| 8-Demethyl-8-Dimethylamino-Flavin-Adenine-Dinucleotide                                                                                                                             | -9.206               | 6.982         | 1.200        | 0     | 0     | 8            | 3       | -5.832                         |
| N-(Sulfanylacetyl)Tyrosylprolylmethioninamide                                                                                                                                      | -9.162               | 6.756         | 0.953        | 0     | 0     | 3            | 3       | -5.854                         |
| Colistin                                                                                                                                                                           | -9.125               | 7.162         | 2.775        | 0     | 0     | 3            | 3       | -9.336                         |

|                                                                                                       |        |       |       |   |   |    |      |         |
|-------------------------------------------------------------------------------------------------------|--------|-------|-------|---|---|----|------|---------|
| 4'-nitrophenyl-3-thiolaminaritrioside                                                                 | -9.014 | 7.581 | 2.914 | 0 | 0 | 0  | 3    | -10.233 |
| Hydroxyethyl cellulose                                                                                | -9.014 | 7.474 | 2.998 | 0 | 0 | 6  | 3    | -9.576  |
| S-(2-Oxo)Pentadecylcoenzyme A                                                                         | -9.000 | 7.474 | 2.683 | 0 | 0 | 5  | 3    | -9.143  |
| 4-Hydroxyphenacyl Coenzyme A                                                                          | -8.999 | 7.581 | 3.002 | 0 | 0 | 4  | 3    | -9.899  |
| CoA-S-Acetyl Tryptamine                                                                               | -8.927 | 7.581 | 3.006 | 0 | 0 | 5  | 3    | -9.784  |
| Vapreotide                                                                                            | -8.904 | 7.474 | 3.142 | 0 | 0 | 5  | 3    | -9.952  |
| Adrabetadex                                                                                           | -8.894 | 5.264 | 2.571 | 0 | 0 | 0  | 3    | -8.054  |
| Thymopentin                                                                                           | -8.889 | 6.625 | 2.654 | 0 | 0 | 1  | 3    | -9.004  |
| Saquinavir                                                                                            | -8.844 | 6.477 | 2.941 | 0 | 0 | 9  | 3    | -8.432  |
| 3-Thiaoctanoyl-Coenzyme A                                                                             | -8.745 | 6.367 | 1.310 | 0 | 0 | 5  | 3    | -5.974  |
| 4-methylpentanoic acid {1-[4-guanidino-1-(thiazole-2-carbonyl)-butylcarbamoyl]-2-methyl-propyl}-amide | -8.745 | 7.581 | 2.743 | 0 | 0 | 0  | 3    | -9.932  |
| Sinapoyl Coenzyme A                                                                                   | -8.736 | 6.630 | 2.629 | 0 | 0 | 4  | 3    | -8.596  |
| P1-(5'-Adenosyl)P5-(5'-Thymidyl)Pentaphosphate                                                        | -8.726 | 6.629 | 1.500 | 0 | 0 | 3  | 3    | -6.731  |
| Dotatate                                                                                              | -8.708 | 7.607 | 2.890 | 0 | 0 | 16 | 3    | -8.257  |
| 3-[3-(2,3-Dihydroxy-Propylamino)-Phenyl]-4-(5-Fluoro-1-Methyl-1h-Indol-3-Yl)-Pyrrole-2,5-Dione        | -8.697 | 6.930 | 2.140 | 0 | 0 | 0  | 3    | -8.428  |
| Iobitridol                                                                                            | -8.697 | 7.231 | 2.803 | 0 | 0 | 5  | 3    | -9.189  |
| Angiotensin II                                                                                        | -8.674 | 6.626 | 2.989 | 0 | 0 | 8  | 3    | -8.739  |
| Flavin adenine dinucleotide                                                                           | -8.539 | 6.486 | 2.880 | 0 | 0 | 4  | 3    | -8.940  |
| Iodixanol                                                                                             | -8.538 | 6.516 | 2.484 | 0 | 0 | 0  | 3    | -8.753  |
| Sufugolix                                                                                             | -8.501 | 6.756 | 1.493 | 0 | 0 | 1  | 3    | -7.048  |
| Elamipretide                                                                                          | -8.476 | 6.845 | 2.877 | 0 | 0 | 19 | 3.05 | -7.371  |
| Flavin-N7 Protonated-Adenine Dinucleotide                                                             | -8.446 | 7.323 | 2.862 | 0 | 0 | 4  | 3    | -9.477  |
| Alatrofloxacin                                                                                        | -8.428 | 7.272 | 2.461 | 0 | 0 | 10 | 3    | -8.006  |
| Methylmalonyl-Coenzyme A                                                                              | -8.428 | 7.214 | 2.749 | 0 | 0 | 14 | 3    | -7.985  |
| CoA-S-Trimethylene-                                                                                   | -8.422 | 7.581 | 2.994 | 0 | 0 | 4  | 3    | -9.886  |

|                                                                              |        |       |       |   |   |    |      |         |
|------------------------------------------------------------------------------|--------|-------|-------|---|---|----|------|---------|
| Acetyl-Tryptamine                                                            |        |       |       |   |   |    |      |         |
| Trifluoroacetyl Coenzyme A                                                   | -8.388 | 6.626 | 2.926 | 0 | 0 | 4  | 3    | -9.117  |
| Je-2147, Ag1776, Kni-764                                                     | -8.329 | 7.336 | 2.784 | 0 | 0 | 9  | 3    | -8.739  |
| Giripladib                                                                   | -8.314 | 7.504 | 2.046 | 0 | 0 | 1  | 3    | -8.530  |
| Efrotomycin                                                                  | -8.288 | 6.329 | 2.120 | 0 | 0 | 9  | 3    | -6.885  |
| 3-[1-(3-aminopropyl)-1h-indol-3-yl]-4-(1h-indol-3-yl)-1h-pyrrole-2,5-dione   | -8.259 | 7.581 | 2.825 | 0 | 0 | 4  | 3    | -9.588  |
| Fosifloxuridine nafalbenamide                                                | -8.250 | 7.068 | 2.322 | 1 | 1 | 3  | 3    | -7.812  |
| HM-30181                                                                     | -8.238 | 5.907 | 1.904 | 0 | 0 | 2  | 3    | -7.072  |
| 2-Hydroxy-5-({1-[(4-Methylphenoxy)Methyl]-3-Oxoprop-1-Enyl}Amino)-L-Tyrosine | -8.232 | 7.056 | 1.456 | 0 | 0 | 4  | 3    | -6.822  |
| Caspofungin                                                                  | -8.208 | 6.737 | 2.322 | 1 | 1 | 5  | 3.2  | -7.432  |
| Benzoyl-Arginine-Alanine-Methyl Ketone                                       | -8.200 | 6.455 | 1.348 | 0 | 0 | 1  | 3    | -6.589  |
| Inhibitor Bea388                                                             | -8.191 | 7.579 | 2.324 | 0 | 0 | 0  | 3    | -9.192  |
| 3-[(5s)-1-Acetyl-3-(2-Chlorophenyl)-4,5-Dihydro-1h-Pyrazol-5-Yl]Phenol       | -8.186 | 7.581 | 3.001 | 0 | 0 | 4  | 3    | -9.897  |
| Cefbuperazone                                                                | -8.171 | 6.631 | 2.153 | 0 | 0 | 2  | 3    | -8.004  |
| Telinavir                                                                    | -8.164 | 7.431 | 2.597 | 1 | 1 | 10 | 0    | -6.351  |
| Nicotinamide-Adenine-Dinucleotide-5-Hydroxy-4-Oxonorvaline                   | -8.154 | 7.581 | 2.883 | 0 | 0 | 0  | 3    | -10.178 |
| Cangrelor                                                                    | -8.151 | 7.099 | 2.961 | 4 | 4 | 4  | 3    | -6.844  |
| Polymyxin B                                                                  | -8.149 | 6.626 | 2.886 | 0 | 0 | 4  | 3    | -9.046  |
| N-(4-carbamimidoylbenzyl)-1-(4-methylpentanoyl)-L-prolinamide                | -8.129 | 7.581 | 2.911 | 0 | 0 | 2  | 3    | -9.983  |
| NUC-1031                                                                     | -8.118 | 7.231 | 2.807 | 0 | 0 | 3  | 3    | -9.441  |
| Larazotide                                                                   | -8.117 | 6.640 | 2.901 | 0 | 0 | 5  | 3    | -8.960  |
| Inarigivir soproxil                                                          | -8.105 | 5.268 | 2.210 | 0 | 0 | 0  | 3    | -7.420  |
| Cephalosporin Analog                                                         | -8.077 | 6.732 | 2.110 | 0 | 0 | 0  | 3.25 | -8.351  |
| FR236913                                                                     | -8.056 | 7.439 | 2.427 | 0 | 0 | 3  | 3    | -8.913  |
| TOP-1288                                                                     | -8.054 | 7.352 | 2.427 | 0 | 0 | 3  | 3    | -8.854  |

|                                                                            |        |       |        |   |   |    |      |        |
|----------------------------------------------------------------------------|--------|-------|--------|---|---|----|------|--------|
| Ioforminol                                                                 | -8.050 | 7.503 | 1.689  | 0 | 0 | 4  | 3    | -7.537 |
| Dirlotapide                                                                | -8.034 | 6.583 | 2.096  | 0 | 0 | 5  | 3    | -7.505 |
| BMS-986094                                                                 | -8.021 | 7.161 | 3.115  | 0 | 0 | 3  | 3    | -9.934 |
| Iopentol                                                                   | -8.016 | 7.507 | 1.239  | 0 | 0 | 0  | 3    | -7.234 |
| Carfilzomib                                                                | -8.009 | 6.950 | 2.160  | 0 | 0 | 5  | 3    | -7.866 |
| 4-Oxo-Nicotinamide-Adenine Dinucleotide Phosphate                          | -8.002 | 8.038 | 2.085  | 0 | 0 | 15 | 0    | -5.917 |
| <b>Inactive group</b>                                                      |        |       |        |   |   |    |      |        |
| Agmatine                                                                   | -2.000 | 4.660 | 0.000  | 0 | 0 | 0  | 0    | -1.780 |
| 1-acetyl-2-lyso-sn-glycero-3-phosphoethanolamine                           | -1.961 | 5.782 | -1.000 | 0 | 0 | 0  | 3    | -2.121 |
| Glycerin                                                                   | -1.961 | 3.921 | 0.000  | 0 | 0 | 0  | 0    | -1.277 |
| Magnesium glycinate                                                        | -1.960 | 4.435 | 0.000  | 0 | 0 | 0  | 0    | -1.627 |
| Zinc glycinate                                                             | -1.960 | 4.435 | 0.000  | 0 | 0 | 0  | 0    | -1.627 |
| Aluminum zirconium octachlorohydroxygly                                    | -1.956 | 4.435 | 0.000  | 0 | 0 | 0  | 0    | -1.627 |
| Dihydroxyacetone                                                           | -1.956 | 4.583 | 0.000  | 0 | 0 | 0  | 0    | -1.727 |
| Ferrous glycine sulfate                                                    | -1.956 | 6.372 | -1.372 | 0 | 0 | 0  | 0    | -0.529 |
| (S)-2-Amino-4-[(2s,3r)-2,3,5-Trihydroxy-4-Oxo-Pentyl]Mercapto-Butyric Acid | -1.908 | 5.143 | -0.750 | 0 | 0 | 0  | 3    | -2.126 |
| 1,4-Butanediol                                                             | -1.859 | 3.464 | 0.000  | 0 | 0 | 0  | 0    | -0.967 |
| Amyl Nitrite                                                               | -1.822 | 3.900 | 0.000  | 0 | 0 | 0  | 0    | -1.263 |
| 3-Oxo-Pentadecanoic Acid                                                   | -1.815 | 4.992 | -0.355 | 0 | 0 | 8  | 0    | -0.404 |
| 4-Hydroxybutan-1-Aminium                                                   | -1.809 | 3.464 | 0.000  | 0 | 0 | 0  | 0    | -0.967 |
| NB-001                                                                     | -1.783 | 7.566 | 0.421  | 0 | 0 | 0  | 0    | -4.497 |
| L-cystein-s-1-(iminomethyl)-l-ornithine                                    | -1.733 | 5.007 | -0.774 | 0 | 0 | 1  | 3    | -1.869 |
| L-Alpha-Glycerophosphorylserine                                            | -1.729 | 5.784 | -1.000 | 0 | 0 | 0  | 3    | -2.122 |
| 2-Hydroxyethyl Disulfide                                                   | -1.698 | 3.696 | 0.000  | 0 | 0 | 0  | 0    | -1.124 |
| Ricinoleic Acid                                                            | -1.612 | 5.028 | 0.232  | 0 | 0 | 10 | 3    | -2.556 |
| cis-Vaccenic acid                                                          | -1.610 | 5.019 | 0.235  | 0 | 0 | 12 | 0    | -0.974 |
| Tylosin                                                                    | -1.587 | 6.055 | 2.468  | 1 | 1 | 16 | 3.05 | -5.815 |
| Dexpanthenol                                                               | -1.578 | 5.420 | -1.334 | 0 | 0 | 1  | 3    | -1.165 |

|                                                          |        |       |        |   |   |    |      |        |
|----------------------------------------------------------|--------|-------|--------|---|---|----|------|--------|
| Nz-(1-Carboxyethyl)-Lysine                               | -1.566 | 4.991 | -1.262 | 0 | 0 | 1  | 3    | -1.000 |
| Troleandomycin                                           | -1.566 | 5.787 | 2.601  | 1 | 1 | 17 | 3.05 | -5.748 |
| N-(Phosphonoacetyl)-L-Ornithine                          | -1.542 | 5.748 | -1.000 | 0 | 0 | 0  | 3    | -2.098 |
| Sevelamer                                                | -1.522 | 4.417 | 0.000  | 0 | 0 | 0  | 3    | -2.952 |
| 3,7,11,15-tetramethyl-hexadecan-1-ol                     | -1.515 | 4.428 | -0.090 | 0 | 0 | 16 | 3    | -0.850 |
| Nz-(Dicarboxymethyl)Lysine                               | -1.508 | 5.271 | -1.095 | 0 | 0 | 0  | 3    | -1.605 |
| L-Alpha-Glycerophosphorylethanolamine                    | -1.502 | 5.729 | -1.365 | 0 | 0 | 0  | 3    | -1.443 |
| 1,3-Propandiol                                           | -1.482 | 3.236 | 0.000  | 0 | 0 | 0  | 0    | -0.812 |
| N-Alpha-L-Acetyl-Arginine                                | -1.475 | 5.085 | -1.316 | 0 | 0 | 1  | 3    | -0.970 |
| Methylethylamine                                         | -1.437 | 2.828 | 0.000  | 0 | 0 | 0  | 0    | -0.534 |
| (9Z,11E,13S)-13-hydroxyoctadeca-9,11-dienoic acid        | -1.410 | 5.270 | 0.420  | 0 | 0 | 10 | 3    | -3.052 |
| (3r)-3-hydroxydodecanoic acid                            | -1.409 | 6.779 | -0.502 | 0 | 0 | 10 | 0    | -1.117 |
| N-Butyl-N'-Hydroxyguanidine                              | -1.371 | 4.743 | 0.000  | 0 | 0 | 0  | 0    | -1.836 |
| 2-Decenoyl N-Acetyl Cysteamine                           | -1.357 | 5.386 | -0.267 | 0 | 0 | 6  | 0    | -1.071 |
| 4-amino-n-[(2-sulfanylethyl)carbamoyl]benzenesulfonamide | -1.335 | 7.704 | -0.602 | 0 | 0 | 0  | 0    | -2.789 |
| Cimetidine                                               | -1.306 | 6.444 | -0.206 | 0 | 0 | 0  | 0    | -2.630 |
| Undecylamine-n,n-dimethyl-n-oxide                        | -1.302 | 5.052 | -1.000 | 0 | 0 | 5  | 0    | 0.324  |
| MF268                                                    | -1.288 | 4.769 | -0.128 | 1 | 1 | 3  | 3    | -1.937 |
| Triethoxycaprylylsilane                                  | -1.283 | 5.280 | -0.445 | 0 | 0 | 5  | 0    | -0.808 |
| Ethyl Isocyanide                                         | -1.203 | 4.000 | 0.000  | 0 | 0 | 0  | 0    | -1.331 |
| Alpha-Linolenic Acid                                     | -1.198 | 5.193 | 0.251  | 0 | 0 | 12 | 0    | -1.120 |
| Sodium lauryl sulfate                                    | -1.178 | 6.423 | -0.594 | 0 | 0 | 6  | 0    | -1.202 |
| Dodecyl sulfate                                          | -1.174 | 6.423 | -0.594 | 0 | 0 | 6  | 0    | -1.202 |
| Magnesium stearate                                       | -1.174 | 4.703 | 1.477  | 0 | 0 | 24 | 0    | -1.480 |
| Guanidine-3-Propanol                                     | -1.153 | 4.642 | 0.000  | 0 | 0 | 0  | 0    | -1.768 |
| Dolastatin 10                                            | -1.137 | 6.615 | 2.239  | 1 | 1 | 10 | 3    | -6.503 |

|                                                                                               |        |       |        |   |   |    |      |        |
|-----------------------------------------------------------------------------------------------|--------|-------|--------|---|---|----|------|--------|
| (10E,12Z)-octadecadienoic acid                                                                | -1.114 | 5.254 | 0.242  | 0 | 0 | 12 | 0    | -1.146 |
| S-(D-Carboxybutyl)-L-Homocysteine                                                             | -1.108 | 4.989 | -1.239 | 0 | 0 | 1  | 3    | -1.040 |
| N2-(Carboxyethyl)-L-Arginine                                                                  | -1.104 | 5.032 | -0.896 | 0 | 0 | 1  | 3    | -1.673 |
| Diethyl propane-1,3-diylbiscarbamate                                                          | -1.072 | 4.833 | -0.737 | 0 | 0 | 0  | 0    | -0.599 |
| GW-274150                                                                                     | -1.060 | 4.989 | -1.275 | 0 | 0 | 1  | 3    | -0.975 |
| Etoglucid                                                                                     | -1.057 | 4.659 | 0.000  | 0 | 0 | 0  | 3    | -3.117 |
| Palmitoleic Acid                                                                              | -1.019 | 5.019 | -0.147 | 0 | 0 | 10 | 0    | -0.545 |
| Odalasvir                                                                                     | -1.013 | 7.471 | 2.999  | 0 | 0 | 54 | 3    | -3.720 |
| 3-Hydroxy-Myristic Acid                                                                       | -1.002 | 4.780 | -0.492 | 0 | 0 | 7  | 3    | -1.481 |
| Nitrosoethane                                                                                 | -0.974 | 3.464 | 0.000  | 0 | 0 | 0  | 0    | -0.967 |
| Elaidoylamide                                                                                 | -0.953 | 5.020 | 0.232  | 0 | 0 | 12 | 0    | -0.969 |
| Bromo-Dodecanol                                                                               | -0.947 | 3.900 | -0.868 | 0 | 0 | 6  | 0    | 0.996  |
| Ethylhexylglycerin                                                                            | -0.914 | 4.419 | -1.128 | 0 | 0 | 2  | 3    | -0.725 |
| Rifampicin                                                                                    | -0.888 | 7.907 | 2.718  | 1 | 2 | 19 | 3.11 | -0.130 |
| 1-Guanidinium-7-Aminoheptane                                                                  | -0.881 | 4.166 | -1.328 | 0 | 0 | 0  | 0    | 0.894  |
| Ethanolamine oleate                                                                           | -0.866 | 5.020 | 0.602  | 0 | 0 | 12 | 0    | -1.619 |
| Ethanol                                                                                       | -0.776 | 2.000 | 0.000  | 0 | 0 | 0  | 0    | 0.029  |
| C31G                                                                                          | -0.753 | 5.243 | 1.428  | 0 | 0 | 12 | 0    | -3.225 |
| N-dodecyl-n,n-dimethylglycinate                                                               | -0.753 | 5.243 | -0.348 | 0 | 0 | 6  | 0    | -0.831 |
| 5-N-Allyl-Arginine                                                                            | -0.752 | 5.420 | -1.259 | 0 | 0 | 0  | 3    | -1.419 |
| Hexaminolevulinate                                                                            | -0.718 | 4.911 | -1.037 | 0 | 0 | 2  | 0    | 0.119  |
| Cetrimonium                                                                                   | -0.607 | 5.073 | 0.070  | 0 | 0 | 10 | 0    | -0.964 |
| Dibutylsuccinate                                                                              | -0.599 | 4.918 | -0.482 | 0 | 0 | 4  | 0    | -0.618 |
| 2-[3-(2-Hydroxy-1,1-Dihydroxymethyl-Ethylamino)-Propylamino]-2-Hydroxymethyl-Propane-1,3-Diol | -0.567 | 5.273 | 0.213  | 0 | 0 | 0  | 0    | -2.571 |
| Tiadenol                                                                                      | -0.524 | 3.939 | 0.000  | 0 | 0 | 5  | 0    | -0.680 |
| N5-(1-Imino-3-Butenyl)-L-Ornithine                                                            | -0.514 | 4.989 | -1.268 | 0 | 0 | 2  | 3    | -0.866 |
| 3,6,9,12,15-Pentaoxaheptadecane                                                               | -0.513 | 3.932 | -0.185 | 0 | 0 | 0  | 0    | -0.960 |



|                                           |        |       |        |   |   |    |   |        |
|-------------------------------------------|--------|-------|--------|---|---|----|---|--------|
| N-Omega-Propyl-L-Arginine                 | -0.511 | 4.989 | -1.143 | 0 | 0 | 0  | 3 | -1.330 |
| Diocetyltrimonium                         | -0.501 | 5.150 | 0.072  | 0 | 0 | 6  | 0 | -1.509 |
| 3,6,9,12,15-pentaoxaheptadecan-1-ol       | 0.471  | 3.939 | 0.000  | 0 | 0 | 0  | 0 | -1.290 |
| Decamethonium                             | -0.459 | 5.066 | -0.845 | 0 | 0 | 3  | 0 | -0.203 |
| 11-[(mercaptocarbonyl)oxy]undecanoic acid | -0.453 | 4.710 | -0.582 | 0 | 0 | 4  | 0 | -0.301 |
| N-Omega-Hydroxy-L-Arginine                | -0.414 | 4.989 | -1.498 | 0 | 0 | 0  | 3 | -0.705 |
| Dodecane-Trimethylamine                   | -0.410 | 5.058 | -0.857 | 0 | 0 | 6  | 0 | 0.190  |
| Hydroxybutyloxide                         | -0.395 | 4.175 | -1.596 | 0 | 0 | 0  | 3 | 0.021  |
| Tris(Hydroxyethyl)Aminomethane            | -0.364 | 5.061 | -1.802 | 0 | 0 | 0  | 0 | 1.119  |
| Lauroyl chloride                          | -0.358 | 4.693 | -1.130 | 0 | 0 | 7  | 0 | 1.041  |
| 12-Hydroxydodecanoic Acid                 | -0.348 | 4.696 | -0.865 | 0 | 0 | 5  | 0 | 0.328  |
| Diethylhomospermine                       | -0.337 | 4.687 | -1.000 | 0 | 0 | 2  | 3 | -1.132 |
| Oleic Acid                                | -0.319 | 5.020 | 0.232  | 0 | 0 | 12 | 0 | -0.969 |
| Silanol                                   | -0.311 | 0.000 | 0.000  | 0 | 0 | 0  | 0 | 1.389  |
| N3, N4-Dimethylarginine                   | -0.295 | 5.340 | -1.269 | 0 | 0 | 0  | 3 | -1.348 |
| Pentaglyme                                | -0.221 | 3.939 | 0.000  | 0 | 0 | 0  | 0 | -1.290 |
| Ocrylate                                  | -0.198 | 5.679 | -0.884 | 0 | 0 | 4  | 0 | -0.429 |
| Isopropyl myristate                       | -0.188 | 4.861 | -0.134 | 0 | 0 | 10 | 0 | -0.461 |
| Monooctanoin                              | -0.151 | 4.802 | -1.000 | 0 | 0 | 2  | 3 | -1.211 |
| 3,6,9,12,15,18-hexaoxaicosane             | -0.112 | 3.951 | 0.313  | 0 | 0 | 0  | 0 | -1.848 |
| Vinyl ether                               | -0.108 | 4.000 | 0.000  | 0 | 0 | 0  | 0 | -1.331 |
| NCX 701                                   | -0.094 | 6.660 | 0.149  | 0 | 0 | 6  | 0 | -2.670 |
| Trolnitrate                               | -0.094 | 5.335 | -0.156 | 1 | 1 | 0  | 0 | -1.300 |
| Methyl Nonanoate (Ester)                  | -0.084 | 4.780 | -1.673 | 0 | 0 | 3  | 0 | 1.449  |
| Palmitic Acid                             | -0.081 | 4.701 | -0.140 | 0 | 0 | 10 | 0 | -0.341 |
| Sebacic acid                              | -0.070 | 4.711 | -1.291 | 0 | 0 | 3  | 0 | 0.824  |
| Azelaic acid                              | -0.064 | 4.712 | -1.381 | 0 | 0 | 2  | 0 | 0.860  |
| Bombykol                                  | -0.004 | 5.084 | -0.189 | 0 | 0 | 10 | 0 | -0.515 |
| Nitrous acid                              | 0.022  | 2.828 | 0.000  | 0 | 0 | 0  | 0 | -0.534 |
| L-Homoarginine                            | 0.040  | 4.989 | -1.366 | 0 | 0 | 0  | 3 | -0.938 |
| O-Decyl Hydrogen Thiocarbonate            | 0.106  | 4.693 | -1.130 | 0 | 0 | 4  | 0 | 0.675  |

|                                                      |       |       |        |   |   |    |      |        |
|------------------------------------------------------|-------|-------|--------|---|---|----|------|--------|
| Lauric acid                                          | 0.148 | 4.693 | -1.130 | 0 | 0 | 6  | 0    | 0.919  |
| Spermine                                             | 0.161 | 3.900 | -0.868 | 0 | 0 | 2  | 0    | 0.508  |
| Quaternium-24                                        | 0.164 | 5.157 | 0.168  | 0 | 0 | 8  | 0    | -1.437 |
| Rifapentine                                          | 0.328 | 7.907 | 2.882  | 1 | 2 | 19 | 3.11 | -0.419 |
| Tetraglyme                                           | 0.353 | 3.913 | -0.618 | 0 | 0 | 0  | 0    | -0.184 |
| 5-(2-hydroxyethyl)nonane-1,9-diol                    | 0.541 | 4.412 | -0.883 | 0 | 0 | 2  | 0    | 0.187  |
| Triglyme                                             | 0.620 | 3.864 | -1.414 | 0 | 0 | 0  | 0    | 1.251  |
| Decane-1-thiol                                       | 0.704 | 3.838 | -1.683 | 0 | 0 | 4  | 0    | 2.228  |
| Tetrabutylammonium Ion                               | 0.711 | 5.212 | -0.156 | 0 | 0 | 12 | 0    | -0.416 |
| Undecylenic acid                                     | 0.719 | 4.710 | -1.366 | 0 | 0 | 5  | 0    | 1.200  |
| 1-dodecanol                                          | 0.953 | 3.884 | -1.136 | 0 | 0 | 6  | 0    | 1.480  |
| Bis(hexamethylene)triamine                           | 0.953 | 3.913 | -0.618 | 0 | 0 | 2  | 0    | 0.060  |
| N-ethyl-N-[3-(propylamino)propyl]propane-1,3-diamine | 1.098 | 3.900 | -0.868 | 0 | 0 | 1  | 0    | 0.386  |
| Cetyl alcohol                                        | 1.134 | 3.932 | -0.185 | 0 | 0 | 10 | 0    | 0.260  |
| Undecanal                                            | 1.413 | 3.959 | -1.511 | 0 | 0 | 5  | 0    | 1.967  |
| 2-[2-[2-(Methoxyethoxy)-Ethoxy]-Ethoxy]-Ethanol      | 1.578 | 3.900 | -0.868 | 0 | 0 | 0  | 0    | 0.264  |
| Trolamine salicylate                                 | 1.736 | 6.906 | -0.299 | 1 | 1 | 0  | 0    | -2.116 |
| MDL72527                                             | 1.843 | 5.090 | -1.037 | 0 | 0 | 4  | 0    | 0.240  |
| Nonan-1-ol                                           | 1.980 | 3.804 | -1.902 | 0 | 0 | 3  | 0    | 2.516  |
| Hydrogen peroxide                                    | 2.196 | 0.000 | 0.000  | 0 | 0 | 0  | 0    | 1.389  |
| Triethylene glycol                                   | 2.428 | 3.804 | -1.902 | 0 | 0 | 0  | 0    | 2.150  |

**Table S6.** MLRA<sub>reg\_6LU7</sub> external set: compounds identification, 6LU7 Mpro docking score, descriptors value and 6LU7 Mpro docking score predicted.

| Compound                                                                                                                                                                                  | Docking score (6LU7) | SpDiam_EA(bo) | Eig09_EA(bo) | nRNR2 | N-068 | CATS2D_05_LL | nLevel1 | Docking score (6LU7) Predicted |
|-------------------------------------------------------------------------------------------------------------------------------------------------------------------------------------------|----------------------|---------------|--------------|-------|-------|--------------|---------|--------------------------------|
| Test active group                                                                                                                                                                         |                      |               |              |       |       |              |         |                                |
| Coenzyme F420                                                                                                                                                                             | -10.613              | 7.581         | 3.001        | 0     | 0     | 5            | 3       | -9.775                         |
| Bleomycin                                                                                                                                                                                 | -10.150              | 7.161         | 3.115        | 0     | 0     | 3            | 3       | -9.934                         |
| Coa-S-Acetyl 5-Bromotryptamine                                                                                                                                                            | -10.141              | 6.761         | 2.697        | 0     | 0     | 6            | 3       | -8.561                         |
| Carbobenzoxo-Pro-Lys-Phe-Y(Po2)-Ala-Pro-Ome                                                                                                                                               | -10.073              | 6.644         | 2.758        | 0     | 0     | 6            | 3       | -8.589                         |
| Icatibant                                                                                                                                                                                 | -9.686               | 7.228         | 2.709        | 1     | 1     | 9            | 0       | -6.532                         |
| BV2                                                                                                                                                                                       | -9.526               | 7.147         | 2.961        | 4     | 4     | 4            | 3       | -6.876                         |
| Glutathionylspermidine Disulfide                                                                                                                                                          | -9.501               | 7.751         | 2.868        | 0     | 0     | 45           | 0       | -3.440                         |
| Angiotensinamide                                                                                                                                                                          | -9.137               | 6.626         | 2.986        | 0     | 0     | 8            | 3       | -8.734                         |
| CBZ-LEU-LEU-TYR-CH2F                                                                                                                                                                      | -9.039               | 6.688         | 2.738        | 0     | 0     | 12           | 3       | -7.852                         |
| 8-epi-Cyanocobalamin                                                                                                                                                                      | -8.959               | 7.687         | 1.915        | 0     | 0     | 12           | 0       | -5.745                         |
| 9-hydroxy-6-(3-hydroxypropyl)-4-(2-methoxyphenyl)pyrrolo[3,4-c]carbazole-1,3(2h,6h)-dione                                                                                                 | -8.908               | 7.679         | 2.082        | 0     | 0     | 7            | 3       | -7.980                         |
| Enalkiren                                                                                                                                                                                 | -8.824               | 7.073         | 2.481        | 0     | 0     | 3            | 3       | -8.760                         |
| Suramin                                                                                                                                                                                   | -8.687               | 6.756         | 1.299        | 0     | 0     | 1            | 3       | -6.708                         |
| N-{1-[5-(1-Carbamoyl-2-Mercapto-Ethylcarbamoyl)-Pentylcarbamoyl]-2-[4-(Difluoro-Phosphono-Methyl)-Phenyl]-Ethyl}-3-[2-[4-(Difluoro-Phosphono-Methyl)-Phenyl]-Acetylamino]-Succinamic Acid | -8.617               | 6.626         | 2.886        | 0     | 0     | 4            | 3       | -9.046                         |
| 2-(Carboxymethoxy)-5-[(2s)-2-((2s)-2-[(3-Carboxypropanoyl)Amino]-3-Phenylpropanoyl)Amino)-3-Oxo-3-(Pentylamino)Propyl]Benzoic Acid                                                        | -8.552               | 7.013         | 2.469        | 0     | 0     | 4            | 3       | -8.575                         |
| Delparantag                                                                                                                                                                               | -8.481               | 5.319         | 2.862        | 0     | 0     | 8            | 3       | -7.627                         |
| Inhibitor Msa367                                                                                                                                                                          | -8.216               | 7.474         | 3.173        | 2     | 2     | 3            | 3       | -8.923                         |
| Fosaprepitant                                                                                                                                                                             | -8.187               | 7.581         | 2.903        | 0     | 0     | 0            | 3       | -10.214                        |
| Isavuconazonium                                                                                                                                                                           | -8.186               | 7.500         | 2.754        | 0     | 0     | 8            | 3       | -8.920                         |
| Sincalide                                                                                                                                                                                 | -8.181               | 7.581         | 2.828        | 0     | 0     | 11           | 3       | -8.739                         |
| 4-Benzoylamino-4-{1-[1-Carbamoyl-2-[4-                                                                                                                                                    | -8.159               | 6.952         | 2.183        | 0     | 0     | 0            | 3       | -8.519                         |

|                                                                                                                           |        |       |        |   |   |    |       |         |
|---------------------------------------------------------------------------------------------------------------------------|--------|-------|--------|---|---|----|-------|---------|
| (Difluoro-Phosphono-Methyl)-Phenyl]-Ethylcarbamoyl]-2-[4-(Difluoro-Phosphono-Methyl)-Phenyl]-Ethylcarbamoyl]-Butyric Acid |        |       |        |   |   |    |       |         |
| LFA703                                                                                                                    | -8.124 | 7.474 | 3.014  | 0 | 0 | 8  | 3     | -9.360  |
| Difelikefalin                                                                                                             | -8.105 | 7.025 | 2.924  | 0 | 0 | 14 | 3     | -8.165  |
| Iomeprol                                                                                                                  | -8.060 | 7.500 | 2.415  | 0 | 0 | 8  | 3     | -8.324  |
| 4-(N,N-Dimethylamino)Cinnamoyl-CoA                                                                                        | -8.055 | 7.557 | 3.149  | 0 | 0 | 45 | 3.286 | -5.267  |
| Rotigaptide                                                                                                               | -8.031 | 7.581 | 2.995  | 0 | 0 | 1  | 3     | -10.253 |
| Test Inactive group                                                                                                       |        |       |        |   |   |    |       |         |
| Glycine                                                                                                                   | -1.960 | 4.435 | 0      | 0 | 0 | 0  | 0     | -1.627  |
| Aluminiumglycinate                                                                                                        | -1.956 | 4.435 | 0      | 0 | 0 | 0  | 0     | -1.627  |
| Argininosuccinate                                                                                                         | -1.864 | 5.141 | -0.322 | 0 | 0 | 0  | 3     | -2.878  |
| 1-Monohexanoyl-2-Hydroxy-Sn-Glycerol-3-Phosphate                                                                          | -1.848 | 5.717 | -1     | 0 | 0 | 0  | 3     | -2.077  |
| (5r)-5-Amino-6-Hydroxyhexylcarbamamic Acid                                                                                | -1.764 | 4.685 | -1.446 | 0 | 0 | 0  | 3     | -0.589  |
| Hypophosphite                                                                                                             | -1.739 | 2.828 | 0      | 0 | 0 | 0  | 0     | -0.534  |
| Nitroarginine                                                                                                             | -1.691 | 5.404 | -1.269 | 0 | 0 | 0  | 3     | -1.391  |
| 3-(1-Aminoethyl)Nonanedioic Acid                                                                                          | -1.637 | 4.891 | -1     | 0 | 0 | 3  | 3     | -1.149  |
| N-omega-nitro-L-arginine methyl ester                                                                                     | -1.523 | 5.404 | -0.919 | 0 | 0 | 0  | 3     | -2.006  |
| 1-(4-hexylphenyl)prop-2-en-1-one                                                                                          | -1.409 | 4.776 | -0.832 | 0 | 0 | 5  | 3     | -1.122  |
| 1-decane-sulfonic-acid                                                                                                    | -1.332 | 6.423 | -1.223 | 0 | 0 | 4  | 0     | -0.338  |
| OTX-008                                                                                                                   | -1.311 | 7.141 | 2.824  | 4 | 4 | 32 | 0     | -1.877  |
| Ethambutol                                                                                                                | -1.241 | 4.408 | -1     | 0 | 0 | 0  | 3     | -1.187  |
| Linoleic acid                                                                                                             | -1.226 | 5.147 | 0.238  | 0 | 0 | 12 | 0     | -1.065  |
| Propatyl nitrate                                                                                                          | -1.221 | 5.449 | -1.128 | 0 | 0 | 0  | 0     | -0.331  |
| Lauryl Dimethylamine-N-Oxide                                                                                              | -1.185 | 5.058 | -0.857 | 0 | 0 | 6  | 0     | 0.19    |
| Stearic acid                                                                                                              | -1.174 | 4.703 | 0.228  | 0 | 0 | 12 | 0     | -0.747  |

|                                                            |        |       |        |   |   |    |   |         |
|------------------------------------------------------------|--------|-------|--------|---|---|----|---|---------|
| methoxyundecylphosphinic acid                              | -1.085 | 5.759 | -0.694 | 0 | 0 | 5  | 0 | -0.696  |
| Decyl(dimethyl)phosphine oxide                             | -1.053 | 5.696 | -1     | 0 | 0 | 4  | 0 | -0.236  |
| 4r-Fluoro-N6-Ethanimidoyl-L-Lysine                         | -0.926 | 5.008 | -1.268 | 0 | 0 | 0  | 3 | -1.123  |
| S-nonyl-cysteine                                           | -0.898 | 4.974 | -0.703 | 0 | 0 | 4  | 3 | -1.607  |
| 4-Oxosebacic Acid                                          | -0.810 | 4.881 | -1.172 | 0 | 0 | 2  | 0 | 0.377   |
| Undecyl-Phosphinic Acid Butyl Ester                        | -0.770 | 4.811 | -0.17  | 0 | 0 | 6  | 0 | -0.851  |
| Octyldodecanol                                             | -0.461 | 4.447 | 0.355  | 0 | 0 | 14 | 3 | -1.89   |
| 2-octyl cyanoacrylate                                      | -0.429 | 5.688 | -0.787 | 0 | 0 | 5  | 3 | -1.821  |
| 11-mercaptoundecanoic acid                                 | -0.318 | 4.693 | -1.13  | 0 | 0 | 4  | 0 | 0.675   |
| 2-(2-[2-(2-Methoxy-Ethoxy)-Ethoxy]-Ethoxy)-Ethoxy)-Ethanol | -0.253 | 3.932 | -0.185 | 0 | 0 | 0  | 0 | -0.96   |
| Palmitrol                                                  | -0.168 | 4.818 | 0.314  | 0 | 0 | 10 | 0 | -1.22   |
| undecan-2-one                                              | -0.039 | 4.686 | -1.476 | 0 | 0 | 5  | 0 | 1.41    |
| N-Tridecanoic Acid                                         | 0.042  | 4.696 | -0.865 | 0 | 0 | 7  | 0 | 0.572   |
| Myristic acid                                              | 0.072  | 4.698 | -0.601 | 0 | 0 | 8  | 0 | 0.229   |
| Capric acid                                                | 0.106  | 4.686 | -1.476 | 0 | 0 | 4  | 0 | 1.288   |
| Diethylnorspermine                                         | 0.113  | 3.932 | -0.185 | 0 | 0 | 0  | 0 | -0.96   |
| N-Octyl-2-Hydroxyethyl Sulfoxide                           | 0.151  | 4.795 | -1.272 | 0 | 0 | 2  | 0 | 0.611   |
| Tilarginine                                                | 0.199  | 4.989 | -1.498 | 0 | 0 | 0  | 3 | -0.705  |
| 1-ethoxy-2-(2-ethoxyethoxy)ethane                          | 0.676  | 3.838 | -1.683 | 0 | 0 | 0  | 0 | 1.74    |
| hexadecanal                                                | 0.752  | 3.981 | -0.196 | 0 | 0 | 10 | 0 | 0.247   |
| decyl formate                                              | 0.902  | 3.966 | -1.218 | 0 | 0 | 4  | 0 | 1.323   |
| 1-(hydroxymethyleneamino)-8-hydroxy-octane                 | 1.075  | 3.864 | -1.414 | 0 | 0 | 1  | 0 | 1.373   |
| Trolamine                                                  | 1.747  | 4.283 | -1.802 | 1 | 1 | 0  | 0 | 2.312   |
| Coumermycin A1                                             | 2.909  | 7.299 | 3.493  | 0 | 0 | 1  | 3 | -10.938 |

**Table S7.** ANN<sub>reg\_6LU7</sub> training set: compounds identification, 6LU7 Mpro docking score, descriptors value and 6LU7 Mpro docking score predicted.

| Compound                                                                                                                                                                    | SM4_B(m) | Eig09_EA(bo) | CATS2D_05_LL | s2_relPathLength | Docking score (6LU7) | Docking score (6LU7) Predicted |
|-----------------------------------------------------------------------------------------------------------------------------------------------------------------------------|----------|--------------|--------------|------------------|----------------------|--------------------------------|
| Gonadorelin                                                                                                                                                                 | 7.954    | 2.998        | 6.000        | 0.046            | -11.695              | -9.045                         |
| Ornipressin                                                                                                                                                                 | 7.773    | 2.883        | 0.000        | 0.022            | -11.367              | -9.029                         |
| Felypressin                                                                                                                                                                 | 7.773    | 2.710        | 5.000        | 0.040            | -10.940              | -8.947                         |
| Carbetocin                                                                                                                                                                  | 7.882    | 2.153        | 0.000        | 0.034            | -10.381              | -8.857                         |
| (E)-(4s,6s)-6-((s)-2-[(furan-2-carbonyl)-amino]-3-methylbutyrylamino)-3-methylbutyrylamino)-8-methyl-5-oxo-4-((r)-2-oxo-pyrrolidin-3-ylmethyl)-non-2-enoic acid ethyl ester | 8.146    | 3.069        | 3.000        | 0.042            | -10.222              | -9.039                         |
| Iotrolan                                                                                                                                                                    | 10.600   | 1.360        | 0.000        | 0.000            | -10.176              | -8.843                         |
| Lypressin                                                                                                                                                                   | 7.244    | 2.376        | 28.000       | 0.037            | -10.107              | -3.920                         |
| Triptorelin                                                                                                                                                                 | 8.089    | 3.139        | 9.000        | 0.043            | -10.045              | -9.192                         |
| Lanreotide                                                                                                                                                                  | 7.312    | 2.077        | 3.000        | 0.057            | -9.973               | -8.686                         |
| Birinapant                                                                                                                                                                  | 7.585    | 2.705        | 16.000       | 0.022            | -9.893               | -5.768                         |
| Indium In-111 pentetreotide                                                                                                                                                 | 8.025    | 3.050        | 8.000        | 0.031            | -9.877               | -9.248                         |
| Ipamorelin                                                                                                                                                                  | 10.602   | 2.099        | 4.000        | 0.000            | -9.873               | -9.593                         |
| UK-432097                                                                                                                                                                   | 7.580    | 2.676        | 12.000       | 0.026            | -9.697               | -7.783                         |
| Pentagastrin                                                                                                                                                                | 7.381    | 2.093        | 1.000        | 0.038            | -9.648               | -8.767                         |
| Terlipressin                                                                                                                                                                | 8.591    | 3.971        | 28.000       | 0.000            | -9.511               | -5.737                         |
| Succinamide-Coa                                                                                                                                                             | 8.071    | 3.012        | 6.000        | 0.046            | -9.472               | -9.063                         |
| Iopamidol                                                                                                                                                                   | 11.292   | 2.393        | 0.000        | 0.000            | -9.397               | -9.754                         |
| BV1                                                                                                                                                                         | 7.523    | 2.842        | 3.000        | 0.026            | -9.387               | -9.034                         |
| Labradimil                                                                                                                                                                  | 7.608    | 2.815        | 8.000        | 0.026            | -9.377               | -8.976                         |
| Etelcalcetide                                                                                                                                                               | 7.250    | 2.506        | 5.000        | 0.060            | -9.353               | -8.781                         |
| LY231514 Tetra Glu                                                                                                                                                          | 7.356    | 2.642        | 5.000        | 0.051            | -9.318               | -8.846                         |
| talactoferrin alpha                                                                                                                                                         | 7.848    | 2.911        | 1.000        | 0.044            | -9.217               | -8.955                         |
| 8-Demethyl-8-Dimethylamino-Flavin-Adenine-Dinucleotide                                                                                                                      | 6.817    | 1.200        | 8.000        | 0.136            | -9.206               | -7.617                         |
| N-(Sulfanylacetyl)Tyrosylprolylmethioninamide                                                                                                                               | 6.667    | 0.953        | 3.000        | 0.080            | -9.162               | -7.253                         |
| Colistin                                                                                                                                                                    | 7.626    | 2.775        | 3.000        | 0.013            | -9.125               | -9.129                         |
| 4'-nitrophenyl-3i-thiolaminaritrioside                                                                                                                                      | 7.798    | 2.914        | 0.000        | 0.016            | -9.014               | -9.079                         |
| Hydroxyethyl cellulose                                                                                                                                                      | 7.954    | 2.998        | 6.000        | 0.046            | -9.014               | -9.045                         |
| S-(2-Oxo)Pentadecylcoa                                                                                                                                                      | 7.560    | 2.683        | 5.000        | 0.069            | -9.000               | -8.854                         |
| 4-Hydroxyphenacyl Coenzyme A                                                                                                                                                | 7.967    | 3.002        | 4.000        | 0.039            | -8.999               | -9.052                         |
| Coa-S-Acetyl Tryptamine                                                                                                                                                     | 8.557    | 3.006        | 5.000        | 0.038            | -8.927               | -9.170                         |
| Vapreotide                                                                                                                                                                  | 7.987    | 3.142        | 5.000        | 0.059            | -8.904               | -8.984                         |
| Adrabetadex                                                                                                                                                                 | 7.836    | 2.571        | 0.000        | 0.088            | -8.894               | -8.862                         |

|                                                                                                        |       |       |        |       |        |        |
|--------------------------------------------------------------------------------------------------------|-------|-------|--------|-------|--------|--------|
| Thymopentin                                                                                            | 7.349 | 2.654 | 1.000  | 0.042 | -8.889 | -8.906 |
| Saquinavir                                                                                             | 7.815 | 2.941 | 9.000  | 0.041 | -8.844 | -9.015 |
| 3-Thiaoctanoyl-Coenzyme A                                                                              | 6.932 | 1.310 | 5.000  | 0.100 | -8.745 | -7.986 |
| 4-methyl-pentanoic acid {1-[4-guanidino-1-(thiazole-2-carbonyl)-butylcarbamoyl]-2-methyl-propyl}-amide | 7.806 | 2.743 | 0.000  | 0.045 | -8.745 | -8.923 |
| Sinapoyl Coenzyme A                                                                                    | 7.276 | 2.629 | 4.000  | 0.036 | -8.736 | -8.884 |
| P1-(5'-Adenosyl)P5-(5'-Thymidyl)Pentaphosphate                                                         | 7.093 | 1.500 | 3.000  | 0.083 | -8.726 | -8.429 |
| Dotatate                                                                                               | 7.547 | 2.890 | 16.000 | 0.080 | -8.708 | -7.711 |
| 3-[3-(2,3-Dihydroxy-Propylamino)-Phenyl]-4-(5-Fluoro-1-Methyl-1h-Indol-3-Yl)-Pyrrole-2,5-Dione         | 7.307 | 2.140 | 0.000  | 0.050 | -8.697 | -8.817 |
| Iobitridol                                                                                             | 7.779 | 2.803 | 5.000  | 0.086 | -8.697 | -8.867 |
| Angiotensin II                                                                                         | 7.800 | 2.989 | 8.000  | 0.037 | -8.674 | -9.095 |
| Flavin adenine dinucleotide                                                                            | 7.838 | 2.880 | 4.000  | 0.064 | -8.539 | -8.915 |
| Iodixanol                                                                                              | 7.509 | 2.484 | 0.000  | 0.048 | -8.538 | -8.881 |
| Sufugolix                                                                                              | 6.757 | 1.493 | 1.000  | 0.071 | -8.501 | -8.536 |
| Elamipretide                                                                                           | 7.802 | 2.877 | 19.000 | 0.034 | -8.476 | -5.487 |
| Flavin-N7 Protonated-Adenine Dinucleotide                                                              | 7.827 | 2.862 | 4.000  | 0.015 | -8.446 | -9.203 |
| Alatrofloxacin                                                                                         | 7.305 | 2.461 | 10.000 | 0.025 | -8.428 | -7.575 |
| Methylmalonyl-Coenzyme A                                                                               | 7.605 | 2.749 | 14.000 | 0.034 | -8.428 | -7.304 |
| Coa-S-Trimethylene-Acetyl-Tryptamine                                                                   | 7.999 | 2.994 | 4.000  | 0.038 | -8.422 | -9.063 |
| Trifluoroacetyl Coenzyme A                                                                             | 7.996 | 2.926 | 4.000  | 0.068 | -8.388 | -8.919 |
| Je-2147, Ag1776, Kni-764                                                                               | 7.472 | 2.784 | 9.000  | 0.087 | -8.329 | -8.771 |
| Giripladib                                                                                             | 7.095 | 2.046 | 1.000  | 0.061 | -8.314 | -8.768 |
| Efrotomycin                                                                                            | 7.248 | 2.120 | 9.000  | 0.058 | -8.288 | -7.537 |
| 3-[1-(3-aminopropyl)-1h-indol-3-yl]-4-(1h-indol-3-yl)-1h-pyrrole-2,5-dione                             | 7.922 | 2.825 | 4.000  | 0.042 | -8.259 | -8.992 |
| Fosifloxuridine nafalbenamide                                                                          | 7.436 | 2.322 | 3.000  | 0.065 | -8.250 | -8.802 |
| HM-30181                                                                                               | 7.515 | 1.904 | 2.000  | 0.060 | -8.238 | -8.691 |
| 2-Hydroxy-5-((1-[(4-Methylphenoxy)Methyl]-3-Oxoprop-1-Enyl)Amino)-L-Tyrosine                           | 6.876 | 1.456 | 4.000  | 0.000 | -8.232 | -5.260 |
| Caspofungin                                                                                            | 7.398 | 2.322 | 5.000  | 0.065 | -8.208 | -8.719 |
| Benzoyl-Arginine-Alanine-Methyl Ketone                                                                 | 6.749 | 1.348 | 1.000  | 0.107 | -8.200 | -8.670 |
| Inhibitor Bea388                                                                                       | 7.568 | 2.324 | 0.000  | 0.049 | -8.191 | -8.861 |
| 3-[(5s)-1-Acetyl-3-(2-Chlorophenyl)-4,5-Dihydro-1h-Pyrazol-5-Yl]Phenol                                 | 7.935 | 3.001 | 4.000  | 0.041 | -8.186 | -9.036 |
| Cefbuperazone                                                                                          | 7.148 | 2.153 | 2.000  | 0.075 | -8.171 | -8.788 |
| Telnavir                                                                                               | 7.555 | 2.597 | 10.000 | 0.000 | -8.164 | -8.023 |
| Nicotinamide-Adenine-Dinucleotide-5-Hydroxy-4-Oxonorvaline                                             | 7.773 | 2.883 | 0.000  | 0.022 | -8.154 | -9.029 |

|                                                                            |        |        |        |       |        |        |
|----------------------------------------------------------------------------|--------|--------|--------|-------|--------|--------|
| Cangrelor                                                                  | 7.878  | 2.961  | 4.000  | 0.014 | -8.151 | -9.258 |
| Polymyxin B                                                                | 7.846  | 2.886  | 4.000  | 0.066 | -8.149 | -8.912 |
| N-(4-carbamimidoylbenzyl)-1-(4-methylpentanoyl)-L-prolinamide              | 7.892  | 2.911  | 2.000  | 0.036 | -8.129 | -9.006 |
| NUC-1031                                                                   | 7.817  | 2.807  | 3.000  | 0.076 | -8.118 | -8.883 |
| Larazotide                                                                 | 7.845  | 2.901  | 5.000  | 0.032 | -8.117 | -9.085 |
| Inarigivir soproxil                                                        | 7.250  | 2.210  | 0.000  | 0.048 | -8.105 | -8.829 |
| Cephalosporin Analog                                                       | 7.431  | 2.110  | 0.000  | 0.113 | -8.077 | -8.840 |
| FR236913                                                                   | 7.470  | 2.427  | 3.000  | 0.029 | -8.056 | -8.857 |
| TOP-1288                                                                   | 7.292  | 2.427  | 3.000  | 0.061 | -8.054 | -8.820 |
| Ioforminol                                                                 | 10.602 | 1.689  | 4.000  | 0.000 | -8.050 | -8.901 |
| Dirilotapide                                                               | 7.326  | 2.096  | 5.000  | 0.066 | -8.034 | -8.574 |
| BMS-986094                                                                 | 8.170  | 3.115  | 3.000  | 0.021 | -8.021 | -9.224 |
| Iopentol                                                                   | 10.600 | 1.239  | 0.000  | 0.000 | -8.016 | -8.630 |
| Carfilzomib                                                                | 7.536  | 2.160  | 5.000  | 0.054 | -8.009 | -8.582 |
| 4-Oxo-Nicotinamide-Adenine Dinucleotide Phosphate                          | 7.110  | 2.085  | 15.000 | 0.000 | -8.002 | -3.431 |
| Agmatine                                                                   | 5.379  | 0.000  | 0.000  | 0.000 | -2.000 | -0.999 |
| 1-acetyl-2-lyso-sn-glycero-3-phosphoethanolamine                           | 6.537  | -1.000 | 0.000  | 0.000 | -1.961 | -0.316 |
| Glycerin                                                                   | 4.893  | 0.000  | 0.000  | 0.000 | -1.961 | -0.901 |
| Magnesium glycinate                                                        | 5.731  | 0.000  | 0.000  | 0.000 | -1.960 | -1.078 |
| Zinc glycinate                                                             | 7.065  | 0.000  | 0.000  | 0.000 | -1.960 | -1.446 |
| Aluminum zirconium octachlorohydrate gly                                   | 8.184  | 0.000  | 0.000  | 0.000 | -1.956 | -1.862 |
| Dihydroxyacetone                                                           | 5.121  | 0.000  | 0.000  | 0.000 | -1.956 | -0.946 |
| Ferrous glycine sulfate                                                    | 7.147  | -1.372 | 0.000  | 0.000 | -1.956 | -0.263 |
| (S)-2-Amino-4-[(2S,3R)-2,3,5-Trihydroxy-4-Oxo-Pentyl]Mercapto-Butyric Acid | 6.376  | -0.750 | 0.000  | 0.000 | -1.908 | -0.401 |
| 1,4-Butanediol                                                             | 4.760  | 0.000  | 0.000  | 0.000 | -1.859 | -0.876 |
| Amyl Nitrite                                                               | 5.281  | 0.000  | 0.000  | 0.000 | -1.822 | -0.979 |
| 3-Oxo-Pentadecanoic Acid                                                   | 6.089  | -0.355 | 8.000  | 0.000 | -1.815 | -0.487 |
| 4-Hydroxybutan-1-Aminium                                                   | 4.724  | 0.000  | 0.000  | 0.000 | -1.809 | -0.870 |
| NB-001                                                                     | 6.424  | 0.421  | 0.000  | 0.000 | -1.783 | -2.578 |
| L-cystein-s-1-(iminomethyl)-l-ornithine                                    | 6.457  | -0.774 | 1.000  | 0.000 | -1.733 | -0.355 |
| L-Alpha-Glycerophosphorylserine                                            | 6.556  | -1.000 | 0.000  | 0.000 | -1.729 | -0.317 |
| 2-Hydroxyethyl Disulfide                                                   | 5.968  | 0.000  | 0.000  | 0.000 | -1.698 | -1.135 |
| Ricinoleic Acid                                                            | 6.195  | 0.232  | 10.000 | 0.000 | -1.612 | -0.772 |
| cis-Vaccenic acid                                                          | 6.119  | 0.235  | 12.000 | 0.000 | -1.610 | -0.950 |
| Tylosin                                                                    | 7.507  | 2.468  | 16.000 | 0.039 | -1.587 | -4.618 |
| Dexpanthenol                                                               | 5.902  | -1.334 | 1.000  | 0.000 | -1.578 | -0.212 |
| Nz-(1-Carboxyethyl)-Lysine                                                 | 6.041  | -1.262 | 1.000  | 0.000 | -1.566 | -0.226 |
| Troleandomycin                                                             | 7.445  | 2.601  | 17.000 | 0.035 | -1.566 | -4.688 |



|                                                          |       |        |        |       |        |        |
|----------------------------------------------------------|-------|--------|--------|-------|--------|--------|
| N-(Phosphonoacetyl)-L-Ornithine                          | 6.590 | -1.000 | 0.000  | 0.000 | -1.542 | -0.319 |
| Sevelamer                                                | 5.871 | 0.000  | 0.000  | 0.000 | -1.522 | -1.112 |
| 3,7,11,15-tetramethyl-hexadecan-1-ol                     | 6.069 | -0.090 | 16.000 | 0.000 | -1.515 | -1.440 |
| Nz-(Dicarboxymethyl)Lysine                               | 6.249 | -1.095 | 0.000  | 0.000 | -1.508 | -0.274 |
| L-Alpha-Glycerophosphorylethanolamine                    | 6.358 | -1.365 | 0.000  | 0.000 | -1.502 | -0.229 |
| 1,3-Propandiol                                           | 4.582 | 0.000  | 0.000  | 0.000 | -1.482 | -0.844 |
| N-Alpha-L-Acetyl-Arginine                                | 6.118 | -1.316 | 1.000  | 0.133 | -1.475 | -1.279 |
| Methylethylamine                                         | 4.236 | 0.000  | 0.000  | 0.000 | -1.437 | -0.786 |
| (9Z,11E,13S)-13-hydroxyoctadeca-9,11-dienoic acid        | 6.246 | 0.420  | 10.000 | 0.000 | -1.410 | -0.851 |
| (3r)-3-hydroxydodecanoic acid                            | 6.188 | -0.502 | 10.000 | 0.000 | -1.409 | -0.604 |
| N-Butyl-N'-Hydroxyguanidine                              | 5.400 | 0.000  | 0.000  | 0.000 | -1.371 | -1.004 |
| 2-Decenoyl N-Acetyl Cysteamine                           | 6.358 | -0.267 | 6.000  | 0.000 | -1.357 | -0.466 |
| 4-amino-n-[(2-sulfanylethyl)carbamoyl]benzenesulfonamide | 6.881 | -0.602 | 0.000  | 0.000 | -1.335 | -0.539 |
| Cimetidine                                               | 6.497 | -0.206 | 0.000  | 0.000 | -1.306 | -0.901 |
| Undecylamine-n,n-dimethyl-n-oxide                        | 5.761 | -1.000 | 5.000  | 0.000 | -1.302 | -0.274 |
| MF268                                                    | 6.109 | -0.128 | 3.000  | 0.000 | -1.288 | -0.541 |
| Triethoxycaprylylsilane                                  | 6.237 | -0.445 | 5.000  | 0.000 | -1.283 | -0.392 |
| Ethyl Isocyanide                                         | 4.849 | 0.000  | 0.000  | 0.000 | -1.203 | -0.893 |
| Alpha-Linolenic Acid                                     | 6.227 | 0.251  | 12.000 | 0.000 | -1.198 | -0.985 |
| Sodium lauryl sulfate                                    | 6.616 | -0.594 | 6.000  | 0.000 | -1.178 | -0.426 |
| Dodecyl sulfate                                          | 6.597 | -0.594 | 6.000  | 0.000 | -1.174 | -0.424 |
| Magnesium stearate                                       | 6.771 | 1.477  | 24.000 | 0.000 | -1.174 | -3.949 |
| Guanidine-3-Propanol                                     | 5.307 | 0.000  | 0.000  | 0.000 | -1.153 | -0.984 |
| Dolastatin 10                                            | 7.487 | 2.239  | 10.000 | 0.032 | -1.137 | -6.920 |
| (10E,12Z)-octadecadienoic acid                           | 6.175 | 0.242  | 12.000 | 0.000 | -1.114 | -0.968 |
| S-(D-Carboxybutyl)-L-Homocysteine                        | 6.250 | -1.239 | 1.000  | 0.000 | -1.108 | -0.238 |
| N2-(Carboxyethyl)-L-Arginine                             | 6.213 | -0.896 | 1.000  | 0.118 | -1.104 | -1.995 |
| Diethyl propane-1,3-diylbiscarbamate                     | 6.008 | -0.737 | 0.000  | 0.000 | -1.072 | -0.378 |
| GW-274150                                                | 6.195 | -1.275 | 1.000  | 0.000 | -1.060 | -0.231 |
| Etoglucid                                                | 6.200 | 0.000  | 0.000  | 0.000 | -1.057 | -1.194 |
| Palmitoleic Acid                                         | 6.031 | -0.147 | 10.000 | 0.000 | -1.019 | -0.643 |
| Odalasvir                                                | 7.843 | 2.999  | 54.000 | 0.041 | -1.013 | -4.910 |
| 3-Hydroxy-Myristic Acid                                  | 5.961 | -0.492 | 7.000  | 0.000 | -1.002 | -0.406 |
| Nitrosoethane                                            | 4.693 | 0.000  | 0.000  | 0.000 | -0.974 | -0.864 |
| Elaidoylamide                                            | 6.110 | 0.232  | 12.000 | 0.000 | -0.953 | -0.947 |
| Bromo-Dodecanol                                          | 7.806 | -0.868 | 6.000  | 0.000 | -0.947 | -0.530 |
| Ethylhexylglycerin                                       | 5.695 | -1.128 | 2.000  | 0.071 | -0.914 | -0.357 |

|                                                                                               |       |        |        |       |        |        |
|-----------------------------------------------------------------------------------------------|-------|--------|--------|-------|--------|--------|
| Rifampicin                                                                                    | 7.580 | 2.718  | 19.000 | 0.019 | -0.888 | -4.668 |
| 1-Guanidinium-7-Aminoheptane                                                                  | 5.486 | -1.328 | 0.000  | 0.000 | -0.881 | -0.204 |
| Ethanolamine oleate                                                                           | 6.269 | 0.602  | 12.000 | 0.000 | -0.866 | -1.124 |
| Ethanol                                                                                       | 3.957 | 0.000  | 0.000  | 0.000 | -0.776 | -0.742 |
| C31G                                                                                          | 6.659 | 1.428  | 12.000 | 0.000 | -0.753 | -1.933 |
| N-dodecyl-n,n-dimethylglycinate                                                               | 6.095 | -0.348 | 6.000  | 0.000 | -0.753 | -0.417 |
| 5-N-Allyl-Arginine                                                                            | 6.055 | -1.259 | 0.000  | 0.000 | -0.752 | -0.234 |
| Hexaminolevulinate                                                                            | 5.963 | -1.037 | 2.000  | 0.000 | -0.718 | -0.251 |
| Cetrimonium                                                                                   | 6.004 | 0.070  | 10.000 | 0.000 | -0.607 | -0.687 |
| Dibutylsuccinate                                                                              | 6.030 | -0.482 | 4.000  | 0.000 | -0.599 | -0.359 |
| 2-[3-(2-Hydroxy-1,1-Dihydroxymethyl-Ethylamino)-Propylamino]-2-Hydroxymethyl-Propane-1,3-Diol | 6.100 | 0.213  | 0.000  | 0.000 | -0.567 | -1.690 |
| Tiadenol                                                                                      | 6.345 | 0.000  | 5.000  | 0.000 | -0.524 | -0.560 |
| N5-(1-Imino-3-Butenyl)-L-Ornithine                                                            | 5.929 | -1.268 | 2.000  | 0.000 | -0.514 | -0.222 |
| 3,6,9,12,15-Pentaoxaheptadecane                                                               | 5.903 | -0.185 | 0.000  | 0.000 | -0.513 | -0.820 |
| N-Omega-Propyl-L-Arginine                                                                     | 5.992 | -1.143 | 0.000  | 0.000 | -0.511 | -0.252 |
| Diocetyl-dimonium                                                                             | 5.949 | 0.072  | 6.000  | 0.000 | -0.501 | -0.526 |
| Decamethonium                                                                                 | 6.001 | -0.845 | 3.000  | 0.000 | -0.459 | -0.283 |
| 11-[(mercaptocarbonyl)oxy]undecanoic acid                                                     | 6.259 | -0.582 | 4.000  | 0.000 | -0.453 | -0.355 |
| N-Omega-Hydroxy-L-Arginine                                                                    | 5.914 | -1.498 | 0.000  | 0.000 | -0.414 | -0.198 |
| Dodecane-Trimethylamine                                                                       | 5.796 | -0.857 | 6.000  | 0.000 | -0.410 | -0.314 |
| Hydroxybutyloxide                                                                             | 5.494 | -1.596 | 0.000  | 0.000 | -0.395 | -0.178 |
| Tris(Hydroxyethyl)Aminomethane                                                                | 5.502 | -1.802 | 0.000  | 0.000 | -0.364 | -0.165 |
| Lauroyl chloride                                                                              | 6.060 | -1.130 | 7.000  | 0.000 | -0.358 | -0.342 |
| 12-Hydroxydodecanoic Acid                                                                     | 5.831 | -0.865 | 5.000  | 0.000 | -0.348 | -0.292 |
| Diethylhomospermine                                                                           | 5.691 | -1.000 | 2.000  | 0.000 | -0.337 | -0.244 |
| Oleic Acid                                                                                    | 6.119 | 0.232  | 12.000 | 0.000 | -0.319 | -0.949 |
| Silanol                                                                                       | 4.468 | 0.000  | 0.000  | 0.000 | -0.311 | -0.825 |
| N3, N4-Dimethylarginine                                                                       | 5.951 | -1.269 | 0.000  | 0.000 | -0.295 | -0.228 |
| Pentaglyme                                                                                    | 5.987 | 0.000  | 0.000  | 0.000 | -0.221 | -1.140 |
| Ocrylate                                                                                      | 6.076 | -0.884 | 4.000  | 0.000 | -0.198 | -0.290 |
| Isopropyl myristate                                                                           | 6.043 | -0.134 | 10.000 | 0.000 | -0.188 | -0.647 |
| Monoctanoin                                                                                   | 5.883 | -1.000 | 2.000  | 0.000 | -0.151 | -0.253 |
| 3,6,9,12,15,18-hexaoxaicosane                                                                 | 6.074 | 0.313  | 0.000  | 0.000 | -0.112 | -2.000 |
| Vinyl ether                                                                                   | 4.967 | 0.000  | 0.000  | 0.000 | -0.108 | -0.916 |
| NCX 701                                                                                       | 6.595 | 0.149  | 6.000  | 0.000 | -0.094 | -0.665 |
| Trolnitrate                                                                                   | 6.605 | -0.156 | 0.000  | 0.000 | -0.094 | -1.002 |
| Methyl Nonanoate (Ester)                                                                      | 5.630 | -1.673 | 3.000  | 0.000 | -0.084 | -0.193 |

|                                                      |       |        |        |       |        |        |
|------------------------------------------------------|-------|--------|--------|-------|--------|--------|
| Palmitic Acid                                        | 5.967 | -0.140 | 10.000 | 0.000 | -0.081 | -0.632 |
| Sebacic acid                                         | 5.925 | -1.291 | 3.000  | 0.000 | -0.070 | -0.228 |
| Azelaic acid                                         | 5.873 | -1.381 | 2.000  | 0.000 | -0.064 | -0.210 |
| Bombykol                                             | 5.915 | -0.189 | 10.000 | 0.000 | -0.004 | -0.613 |
| Nitrous acid                                         | 4.600 | 0.000  | 0.000  | 0.000 | 0.022  | -0.848 |
| L-Homoarginine                                       | 5.892 | -1.366 | 0.000  | 0.000 | 0.040  | -0.212 |
| O-Decyl Hydrogen Thiocarbonate                       | 6.005 | -1.130 | 4.000  | 0.000 | 0.106  | -0.259 |
| Lauric acid                                          | 5.750 | -1.130 | 6.000  | 0.000 | 0.148  | -0.286 |
| Spermine                                             | 5.602 | -0.868 | 2.000  | 0.000 | 0.161  | -0.261 |
| Quaternium-24                                        | 6.210 | 0.168  | 8.000  | 0.000 | 0.164  | -0.637 |
| Rifapentine                                          | 7.628 | 2.882  | 19.000 | 0.018 | 0.328  | -5.312 |
| Tetraglyme                                           | 5.799 | -0.618 | 0.000  | 0.000 | 0.353  | -0.421 |
| 3,6,9,12,15-pentaoxaheptadecan-1-ol                  | 5.973 | 0.000  | 0.000  | 0.000 | -0.471 | -1.136 |
| 5-(2-hydroxyethyl)nonane-1,9-diol                    | 5.652 | -0.883 | 2.000  | 0.000 | 0.541  | -0.261 |
| Triglyme                                             | 5.568 | -1.414 | 0.000  | 0.000 | 0.620  | -0.196 |
| Decane-1-thiol                                       | 5.651 | -1.683 | 4.000  | 0.000 | 0.704  | -0.207 |
| Tetrabutylammonium Ion                               | 5.832 | -0.156 | 12.000 | 0.000 | 0.711  | -0.780 |
| Undecylenic acid                                     | 5.768 | -1.366 | 5.000  | 0.000 | 0.719  | -0.247 |
| 1-dodecanol                                          | 5.491 | -1.136 | 6.000  | 0.000 | 0.953  | -0.269 |
| Bis(hexamethylene)triamine                           | 5.652 | -0.618 | 2.000  | 0.000 | 0.953  | -0.322 |
| N-ethyl-N-[3-(propylamino)propyl]propane-1,3-diamine | 5.595 | -0.868 | 1.000  | 0.000 | 1.098  | -0.275 |
| Cetyl alcohol                                        | 5.764 | -0.185 | 10.000 | 0.000 | 1.134  | -0.588 |
| Undecanal                                            | 5.534 | -1.511 | 5.000  | 0.000 | 1.413  | -0.228 |
| 2-[2-[2-2-(Methoxy-Ethoxy)-Ethoxy]-Ethoxy]-Ethanol   | 5.725 | -0.868 | 0.000  | 0.000 | 1.578  | -0.310 |
| Trolamine salicylate                                 | 6.366 | -0.299 | 0.000  | 0.000 | 1.736  | -0.754 |
| MDL72527                                             | 5.931 | -1.037 | 4.000  | 0.000 | 1.843  | -0.263 |
| Nonan-1-ol                                           | 5.222 | -1.902 | 3.000  | 0.000 | 1.980  | -0.173 |
| Hydrogen peroxide                                    | 3.583 | 0.000  | 0.000  | 0.000 | 2.196  | -0.688 |
| Triethylene glycol                                   | 5.370 | -1.902 | 0.000  | 0.000 | 2.428  | -0.157 |

**Table S8.** ANN<sub>reg\_6LU7</sub> external set: compounds identification, 6LU7 Mpro docking score, descriptors value and 6LU7 Mpro docking score predicted.

| Compound                                                                                                                                                                                  | SM4_B(m) | Eig09_EA(bo) | CATS2D_05_LL | s2_relPathLength | Docking score (6LU7) | Docking score (6LU7) Predicted |
|-------------------------------------------------------------------------------------------------------------------------------------------------------------------------------------------|----------|--------------|--------------|------------------|----------------------|--------------------------------|
| Test active group                                                                                                                                                                         |          |              |              |                  |                      |                                |
| Coenzyme F420                                                                                                                                                                             | 8.018    | 3.001        | 5            | 0.036            | -10.613              | -9.104                         |
| Bleomycin                                                                                                                                                                                 | 8.170    | 3.115        | 3            | 0.021            | -10.150              | -9.224                         |
| Coa-S-Acetyl 5-Bromotryptamine                                                                                                                                                            | 7.514    | 2.697        | 6            | 0.064            | -10.141              | -8.841                         |
| Carbobenzoxy-Pro-Lys-Phe-Y(Po2)-Ala-Pro-Ome                                                                                                                                               | 7.730    | 2.758        | 6            | 0.067            | -10.073              | -8.872                         |
| Icatibant                                                                                                                                                                                 | 7.533    | 2.709        | 9            | 0.000            | -9.686               | -8.720                         |
| BV2                                                                                                                                                                                       | 7.866    | 2.961        | 4            | 0.015            | -9.526               | -9.248                         |
| Glutathionylspermidine Disulfide                                                                                                                                                          | 7.759    | 2.868        | 45           | 0.000            | -9.501               | -4.907                         |
| Angiotensinamide                                                                                                                                                                          | 7.790    | 2.986        | 8            | 0.041            | -9.137               | -9.063                         |
| CBZ-LEU-LEU-TYR-CH2F                                                                                                                                                                      | 7.714    | 2.738        | 12           | 0.030            | -9.039               | -8.141                         |
| 8-epi-Cyanocobalamin                                                                                                                                                                      | 7.052    | 1.915        | 12           | 0.000            | -8.959               | -3.301                         |
| 9-hydroxy-6-(3-hydroxypropyl)-4-(2-methoxyphenyl)pyrrolo [3,4-c]carbazole-1,3(2h,6h)-dione                                                                                                | 7.037    | 2.082        | 7            | 0.000            | -8.908               | -6.702                         |
| Enalkiren                                                                                                                                                                                 | 7.276    | 2.481        | 3            | 0.071            | -8.824               | -8.832                         |
| Suramin                                                                                                                                                                                   | 6.735    | 1.299        | 1            | 0.074            | -8.687               | -8.393                         |
| N-{1-[5-(1-Carbamoyl-2-Mercapto-Ethylcarbamoyl)-Pentylcarbamoyl]-2-[4-(Difluoro-Phosphono-Methyl)-Phenyl]-Ethyl}-3-[2-[4-(Difluoro-Phosphono-Methyl)-Phenyl]-Acetylamino]-Succinamic Acid | 7.854    | 2.886        | 4            | 0.067            | -8.617               | -8.910                         |
| 2-(Carboxymethoxy)-5-[(2s)-2-((2s)-2-[(3-Carboxypropanoyl)Amino]-3-Phenylpropanoyl)Amino)-3-Oxo-3-(Pentylamino)Propyl]Benzoic Acid                                                        | 7.256    | 2.469        | 4            | 0.140            | -8.552               | -8.840                         |
| Delparantag                                                                                                                                                                               | 7.750    | 2.862        | 8            | 0.037            | -8.481               | -8.991                         |
| Inhibitor Msa367                                                                                                                                                                          | 9.364    | 3.173        | 3            | 0.043            | -8.216               | -9.167                         |
| Fosaprepitant                                                                                                                                                                             | 7.775    | 2.903        | 0            | 0.016            | -8.187               | -9.071                         |
| Isavuconazonium                                                                                                                                                                           | 11.295   | 2.754        | 8            | 0.015            | -8.186               | -10.182                        |
| Sincalide                                                                                                                                                                                 | 7.930    | 2.828        | 11           | 0.038            | -8.181               | -8.746                         |
| 4-Benzoylamino-4-[1-[1-Carbamoyl-2-[4-                                                                                                                                                    | 7.281    | 2.183        | 0            | 0.040            | -8.159               | -8.824                         |

|                                                                                                                           |        |        |    |       |        |         |
|---------------------------------------------------------------------------------------------------------------------------|--------|--------|----|-------|--------|---------|
| (Difluoro-Phosphono-Methyl)-Phenyl]-Ethylcarbamoyl]-2-[4-(Difluoro-Phosphono-Methyl)-Phenyl]-Ethylcarbamoyl]-Butyric Acid |        |        |    |       |        |         |
| LFA703                                                                                                                    | 7.942  | 3.014  | 8  | 0.052 | -8.124 | -9.023  |
| Difelikefalin                                                                                                             | 7.864  | 2.924  | 14 | 0.046 | -8.105 | -8.294  |
| Iomeprol                                                                                                                  | 11.293 | 2.415  | 8  | 0.000 | -8.060 | -10.033 |
| 4-(N,N-Dimethylamino)Cinnamoyl-CoA                                                                                        | 8.265  | 3.149  | 45 | 0.044 | -8.055 | -4.880  |
| Rotigaptide                                                                                                               | 8.047  | 2.995  | 1  | 0.029 | -8.031 | -9.053  |
| Test inactive group                                                                                                       |        |        |    |       |        |         |
| Glycine                                                                                                                   | 4.985  | 0.000  | 0  | 0.000 | -1.960 | -0.919  |
| Aluminiumglycinate                                                                                                        | 5.199  | 0.000  | 0  | 0.000 | -1.956 | -0.962  |
| Argininosuccinate                                                                                                         | 6.436  | -0.322 | 0  | 0.050 | -1.864 | -1.862  |
| 1-Monohexanoyl-2-Hydroxy-Sn-Glycero-3-Phosphate                                                                           | 6.565  | -1.000 | 0  | 0.000 | -1.848 | -0.318  |
| (5r)-5-Amino-6-Hydroxyhexylcarbamic Acid                                                                                  | 5.708  | -1.446 | 0  | 0.000 | -1.764 | -0.197  |
| Hypophosphite                                                                                                             | 5.490  | 0.000  | 0  | 0.000 | -1.739 | -1.024  |
| Nitroarginine                                                                                                             | 6.242  | -1.269 | 0  | 0.000 | -1.691 | -0.240  |
| 3-(1-Aminoethyl)Nonanedioic Acid                                                                                          | 6.074  | -1.000 | 3  | 0.063 | -1.637 | -0.319  |
| N-omega-nitro-L-arginine methyl ester                                                                                     | 6.283  | -0.919 | 0  | 0.000 | -1.523 | -0.326  |
| 1-(4-hexylphenyl)prop-2-en-1-one                                                                                          | 5.858  | -0.832 | 5  | 0.000 | -1.409 | -0.298  |
| 1-decane-sulfonic-acid                                                                                                    | 6.496  | -1.223 | 4  | 0.000 | -1.332 | -0.279  |
| OTX-008                                                                                                                   | 7.679  | 2.824  | 32 | 0.000 | -1.311 | -4.812  |
| Ethambutol                                                                                                                | 5.690  | -1.000 | 0  | 0.143 | -1.241 | -3.271  |
| Linoleic acid                                                                                                             | 6.175  | 0.238  | 12 | 0.000 | -1.226 | -0.967  |
| Propatyl nitrate                                                                                                          | 6.586  | -1.128 | 0  | 0.000 | -1.221 | -0.284  |
| Lauryl Dimethylamine-N-Oxide                                                                                              | 5.819  | -0.857 | 6  | 0.000 | -1.185 | -0.316  |
| Stearic acid                                                                                                              | 6.060  | 0.228  | 12 | 0.000 | -1.174 | -0.932  |
| methoxyundecylphosphinic acid                                                                                             | 6.388  | -0.694 | 5  | 0.000 | -1.085 | -0.358  |

|                                                            |       |        |    |       |        |        |
|------------------------------------------------------------|-------|--------|----|-------|--------|--------|
| Decyl(dimethyl)phosphine oxide                             | 6.294 | -1.000 | 4  | 0.000 | -1.053 | -0.289 |
| 4r-Fluoro-N6-Ethanimidoyl-L-Lysine                         | 5.997 | -1.268 | 0  | 0.000 | -0.926 | -0.230 |
| S-nonyl-cysteine                                           | 6.168 | -0.703 | 4  | 0.000 | -0.898 | -0.324 |
| 4-Oxosebacic Acid                                          | 6.096 | -1.172 | 2  | 0.000 | -0.810 | -0.240 |
| Undecyl-Phosphinic Acid Butyl Ester                        | 6.339 | -0.170 | 6  | 0.000 | -0.770 | -0.491 |
| Octyldodecanol                                             | 5.999 | 0.355  | 14 | 0.095 | -0.461 | -0.349 |
| 2-octyl cyanoacrylate                                      | 6.097 | -0.787 | 5  | 0.000 | -0.429 | -0.321 |
| 11-mercaptoundecanoic acid                                 | 5.996 | -1.130 | 4  | 0.000 | -0.318 | -0.258 |
| 2-(2-[2-(2-Methoxy-Ethoxy)-Ethoxy]-Ethoxy)-Ethoxy)-Ethanol | 5.926 | -0.185 | 0  | 0.000 | -0.253 | -0.824 |
| Palmidrol                                                  | 6.110 | 0.314  | 10 | 0.000 | -0.168 | -0.780 |
| undecan-2-one                                              | 5.593 | -1.476 | 5  | 0.000 | -0.039 | -0.232 |
| N-Tridecanoic Acid                                         | 5.809 | -0.865 | 7  | 0.000 | 0.042  | -0.345 |
| Myristic acid                                              | 5.864 | -0.601 | 8  | 0.000 | 0.072  | -0.422 |
| Capric acid                                                | 5.621 | -1.476 | 4  | 0.000 | 0.106  | -0.216 |
| Diethylnorspermine                                         | 5.803 | -0.185 | 0  | 0.000 | 0.113  | -0.803 |
| N-Octyl-2-Hydroxyethyl Sulfoxide                           | 6.178 | -1.272 | 2  | 0.000 | 0.151  | -0.232 |
| Tilarginine                                                | 5.893 | -1.498 | 0  | 0.000 | 0.199  | -0.197 |
| 1-ethoxy-2-(2-ethoxyethoxy)ethane                          | 5.438 | -1.683 | 0  | 0.000 | 0.676  | -0.170 |
| hexadecanal                                                | 5.853 | -0.196 | 10 | 0.000 | 0.752  | -0.601 |
| decyl formate                                              | 5.646 | -1.218 | 4  | 0.000 | 0.902  | -0.233 |
| 1-(hydroxymethyleneamino)-8-hydroxy-octane                 | 5.464 | -1.414 | 1  | 0.000 | 1.075  | -0.191 |
| Trolamine                                                  | 5.375 | -1.802 | 0  | 0.000 | 1.747  | -0.162 |
| Coumermycin A1                                             | 7.969 | 3.493  | 1  | 0.031 | 2.909  | -9.079 |

**Table S9.** Descriptors' value for the selected anti-SARS-coV-2 compounds.

| Compound                                                                                                                                                             | MPC08 | SpDiam_EA(bo) | Eig09_EA(bo) | nRNR2 | N-068 | CATS2D_05_LL | nLevel1 | SM4_B(m) | s2_relPath Length |
|----------------------------------------------------------------------------------------------------------------------------------------------------------------------|-------|---------------|--------------|-------|-------|--------------|---------|----------|-------------------|
| Docetaxol                                                                                                                                                            | 6.232 | 7.196         | 2.654        | 0     | 0     | 15           | 3.273   | 7.576    | 0.056             |
| Ginsenoside                                                                                                                                                          | 6.489 | 6.391         | 2.638        | 0     | 0     | 32           | 3.154   | 7.519    | 0.040             |
| Josamycin                                                                                                                                                            | 5.493 | 6.035         | 2.400        | 1     | 1     | 13           | 3.063   | 7.420    | 0.058             |
| [(3R,6S)-3,4,5-tris(acetyloxy)-6-{4-[bis(2-hydroxyethyl)carbamoyl]-2-methoxyphenoxy}oxan-2-yl)methyl acetate (Molport-046-067-769)                                   | 5.193 | 6.985         | 2.261        | 0     | 0     | 0            | 3.000   | 7.189    | 0.093             |
| (2S,5S)-2-[(4-methoxyphenyl)methyl]-4,5-dimethyl-11-[4-oxo-4-(2,4,5-trimethoxyphenyl)butanoyl]-1,4,7,11-tetraazacyclopentadecane-3,6,15-trione (Molport-046-568-802) | 4.836 | 7.137         | 2.559        | 0     | 0     | 9            | 3.000   | 7.327    | 0.074             |
| Pepstatin A                                                                                                                                                          | 4.220 | 5.307         | 2.100        | 0     | 0     | 10           | 3.000   | 7.221    | 0.030             |
